# Supplementary material for: Gene Expression Response in Peripheral Blood Cells of Petroleum Workers Exposed to Sub-Ppm Benzene Levels
Source: MDPI journal article supplement (doi:10.3390/ijerph15112385), 2018-10-27

The 16 selected Jak-STAT fold change genes at time 2

**IL9**

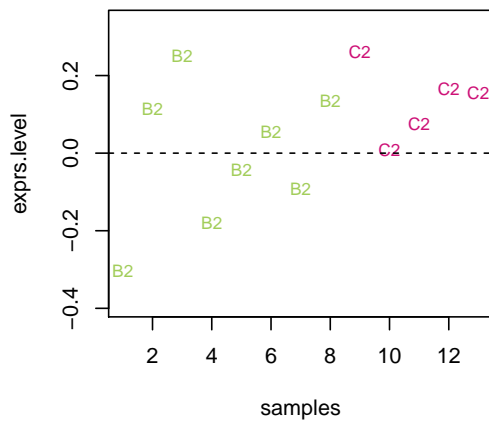

**EPO**

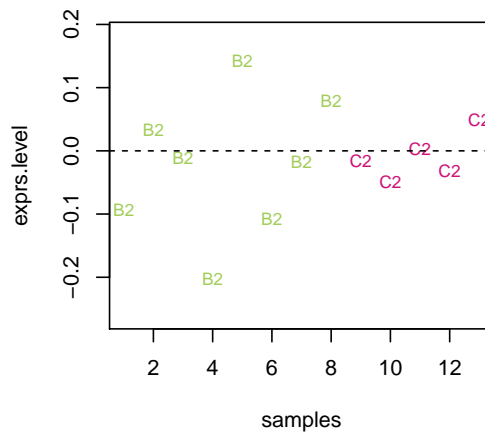

**IL19**

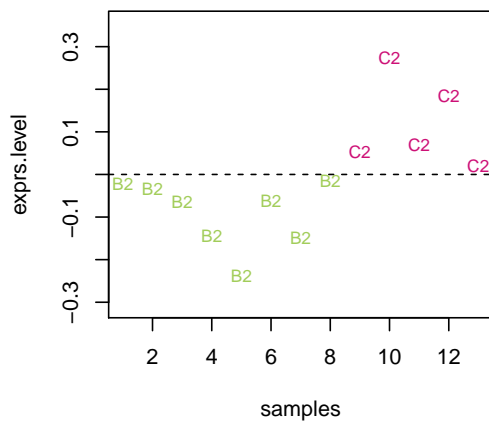

**GH2**

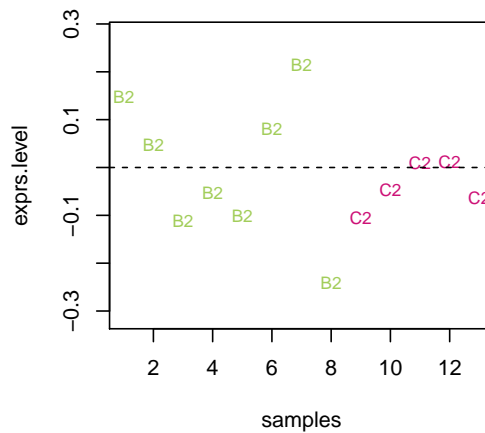

The 16 selected Jak-STAT fold change genes at time 2

**IL5RA**

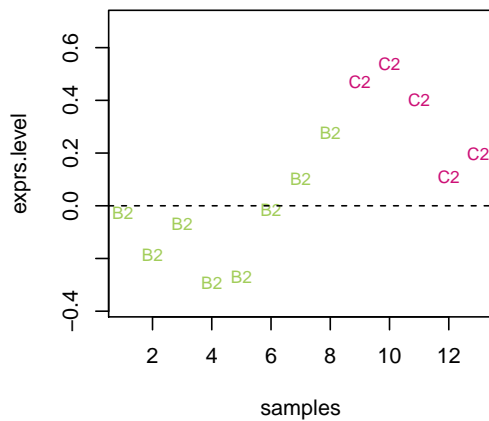

**IL6ST\_b**

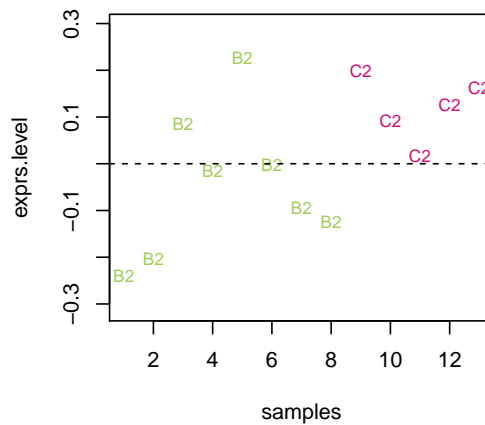

**IL21R**

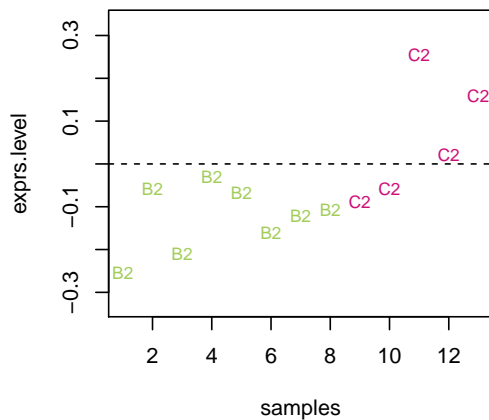

**IL6**

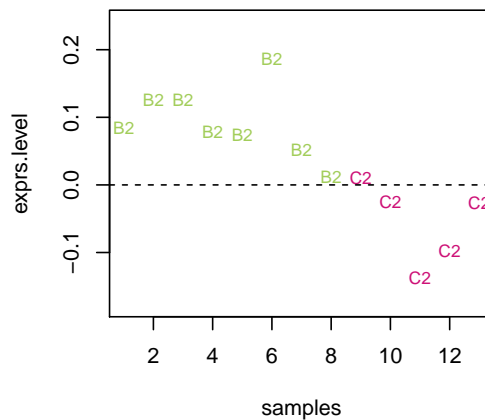

The 16 selected Jak-STAT fold change genes at time 2

**TSLP**

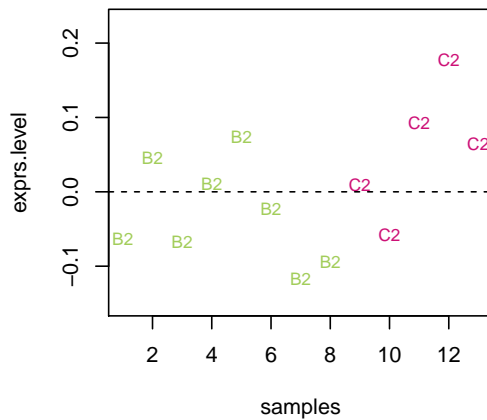

**IL3**

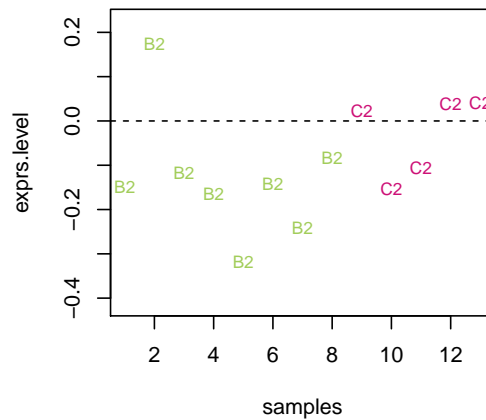

**IL6ST\_a**

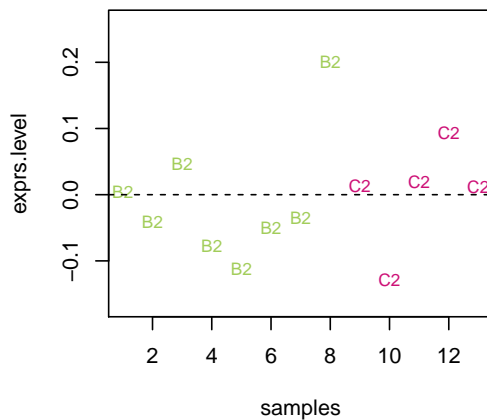

**PIK3CD**

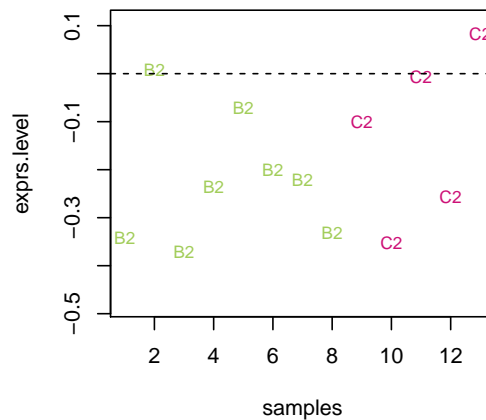

The 16 selected Jak-STAT fold change genes at time 2

**PDGFA**

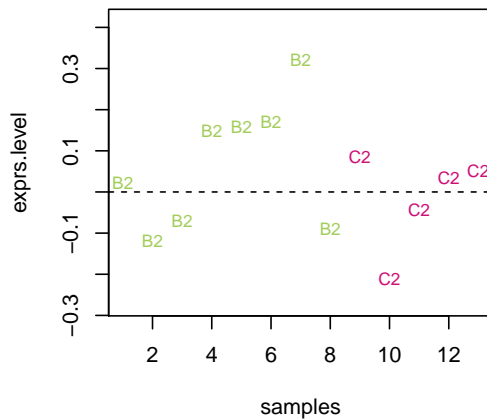

**IFNA2**

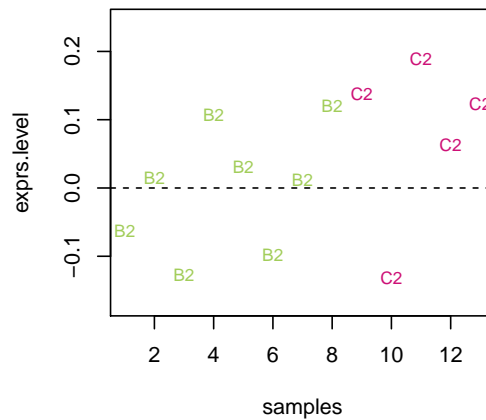

**SOCS1**

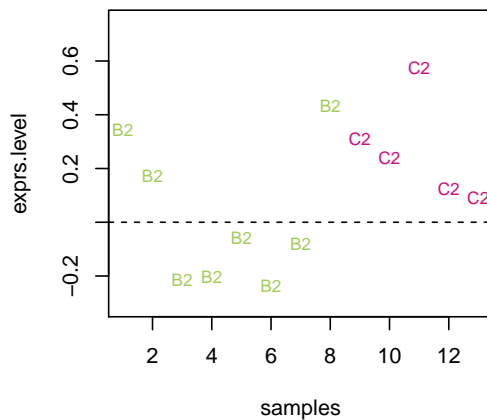

**IFNA16**

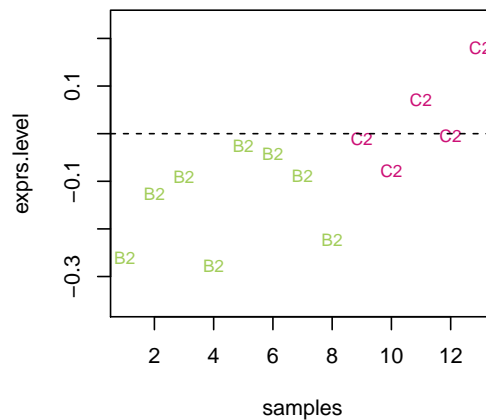

Supplement: s1 [file s1]
