# Supplementary material for: Gene Expression Response in Peripheral Blood Cells of Petroleum Workers Exposed to Sub-Ppm Benzene Levels
Source: MDPI journal article supplement (doi:10.3390/ijerph15112385), 2018-10-27

**IL9**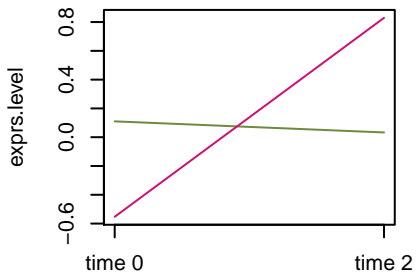

time point

**IL6**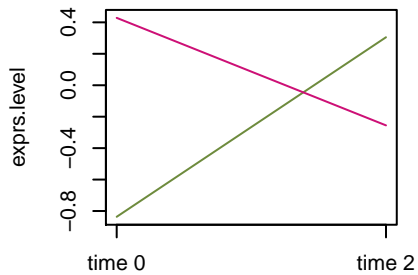

time point

**SOCS1**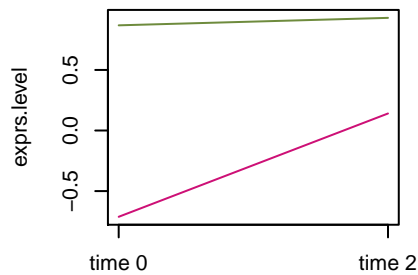

time point

**EPO**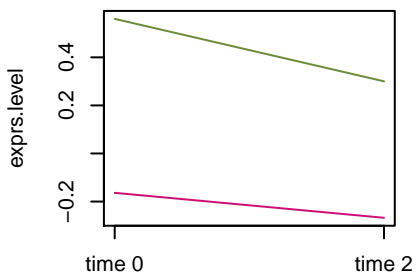

time point

**TSLP**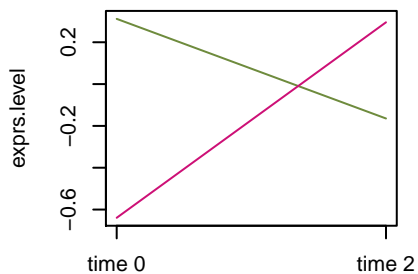

time point

**IFNA16**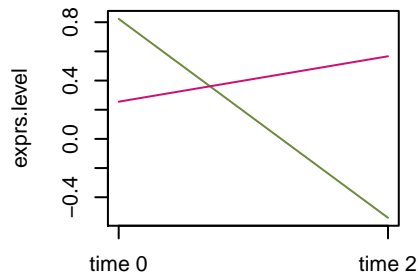

time point

**IL19**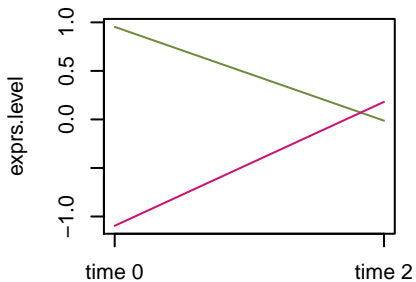

time point

**IL3**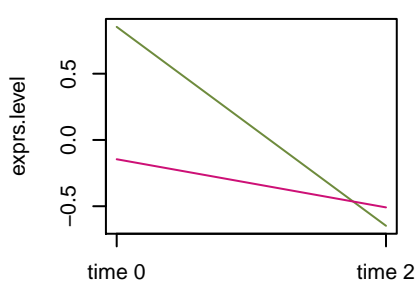

time point

**GH2**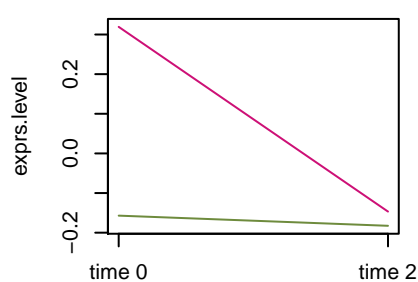

time point

**IL6ST\_a**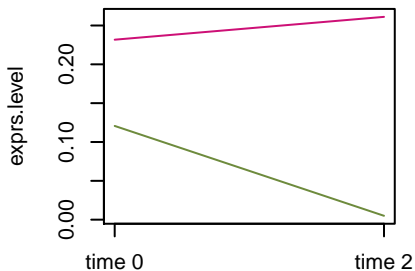

time point

**IL5RA**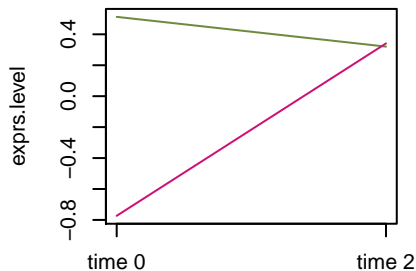

time point

**PIK3CD**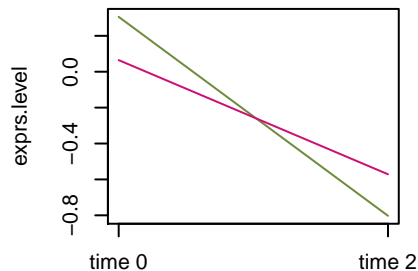

time point

**IL6ST\_b**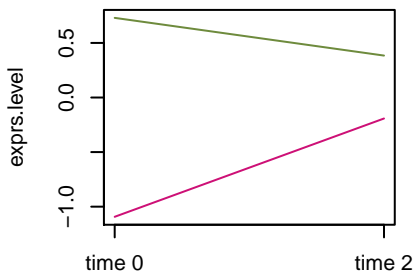

time point

**PDGFA**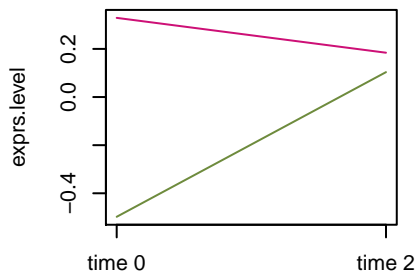

time point

**IL21R**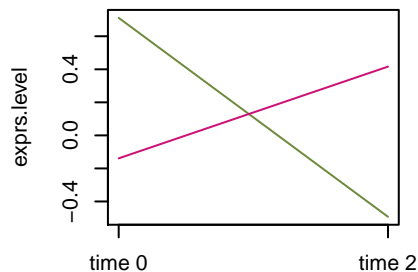

time point

**IFNA2**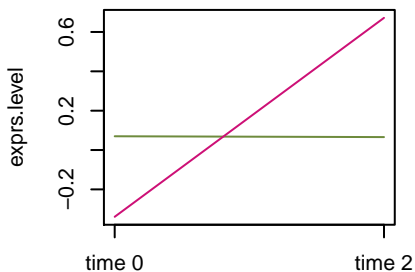

time point

**PRG2**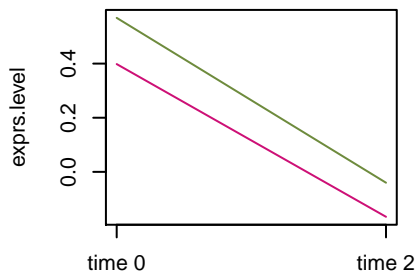

time point

**NFKB1**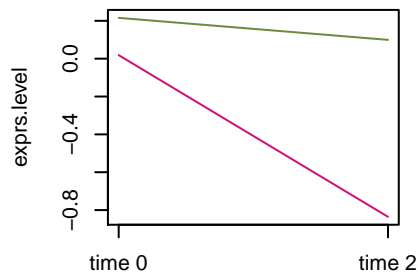

time point

**IFNB1**

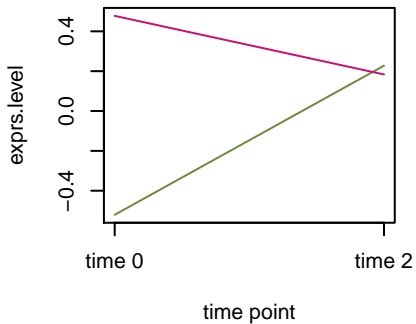

**ACSL1**

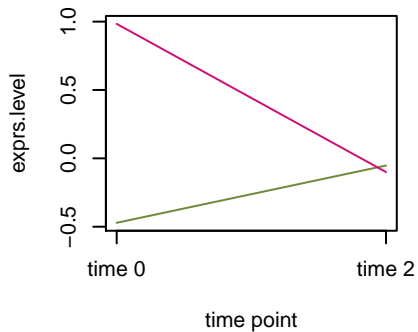

**CLEC5A**

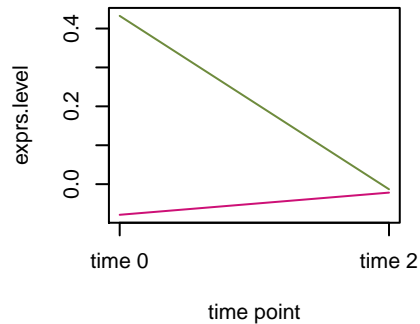

**AQP9**

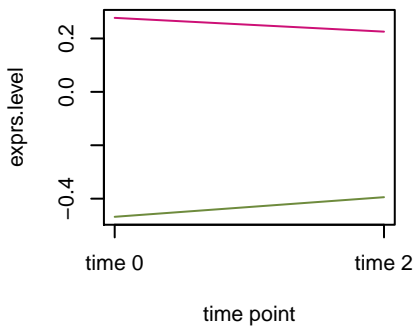

Supplement: s1 [file s1]
