# Supplementary material for: Gene Expression Response in Peripheral Blood Cells of Petroleum Workers Exposed to Sub-Ppm Benzene Levels
Source: MDPI journal article supplement (doi:10.3390/ijerph15112385), 2018-10-27

Gene plots of best pairwise markers

**Fold data, time 2**  
**CLEC5A vs ACSL1**

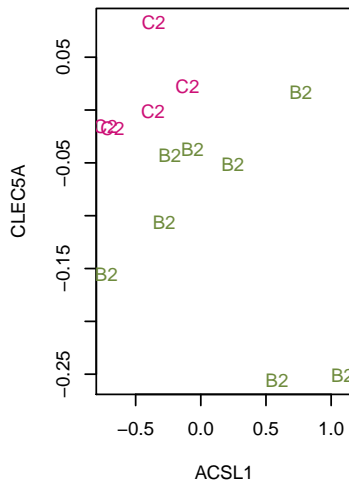

**Fold data, time 2**  
**IL6 vs IL19**

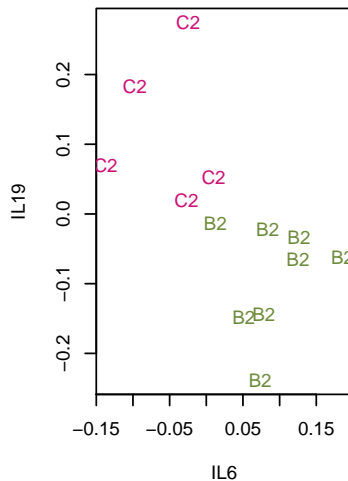

**Fold data, time 2**  
**IL6 vs SOCS1**

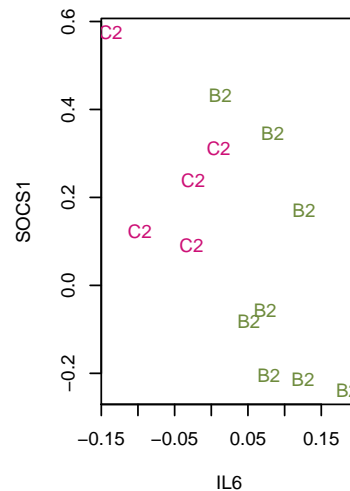

**response:**  
**B vs C**

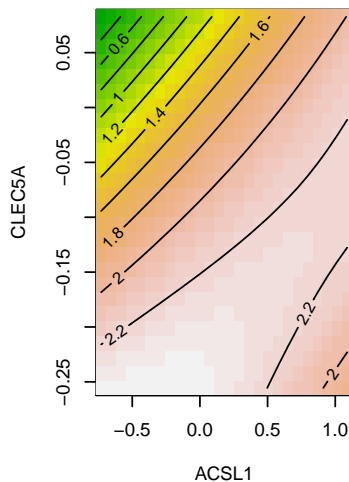

**response:**  
**B vs C**

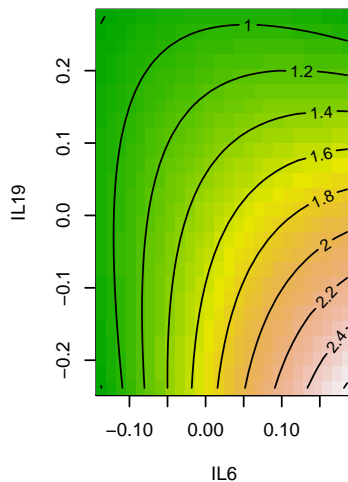

**response:**  
**B vs C**

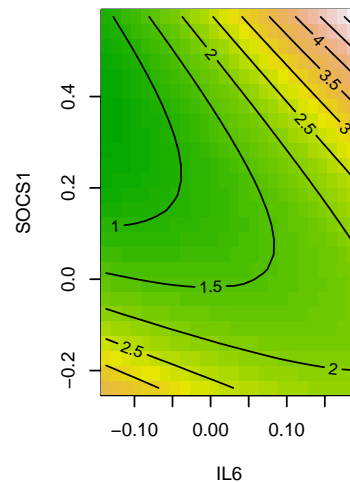

### Unfold data, time 0 CLEC5A vs ACSL1

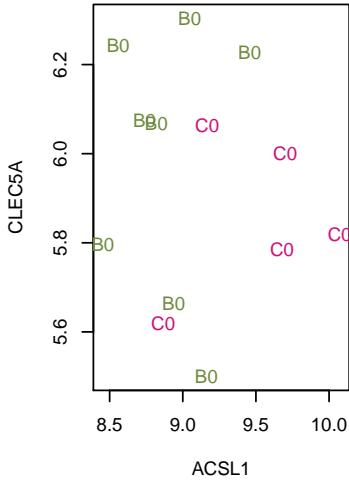

**Unfold data, time 0**  
**IL6 vs SOCS1**

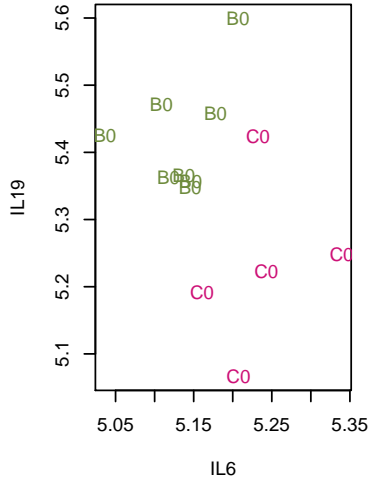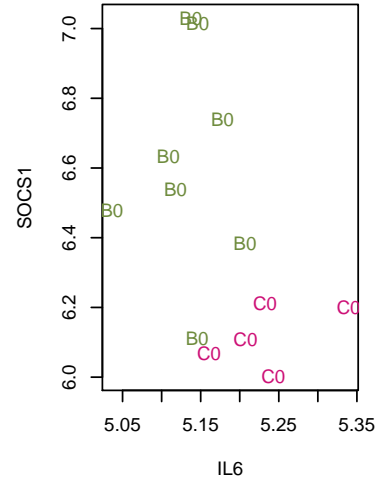

**response:**  
**B vs C**

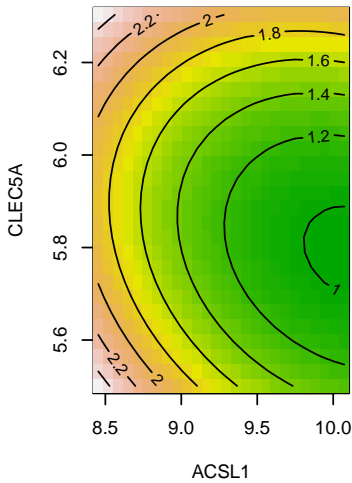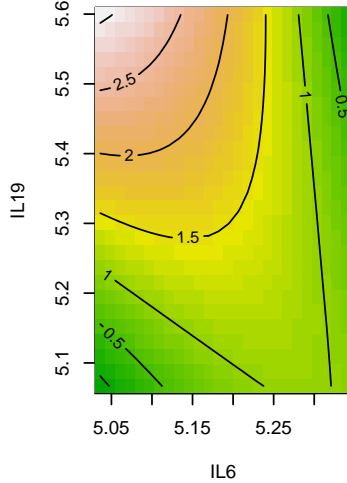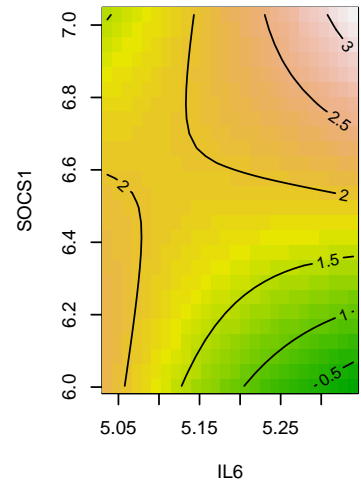

Supplement: s1 [file s1]
