# Supplementary material for: Gene Expression Response in Peripheral Blood Cells of Petroleum Workers Exposed to Sub-Ppm Benzene Levels
Source: MDPI journal article supplement (doi:10.3390/ijerph15112385), 2018-10-27
Supplement: s1 [file s1]

# Jak-STAT genes no fold change

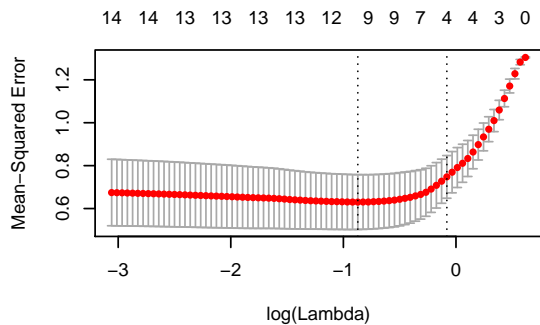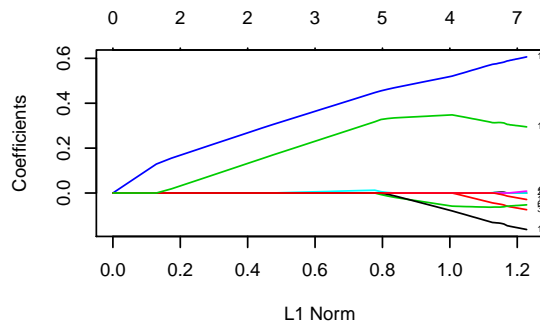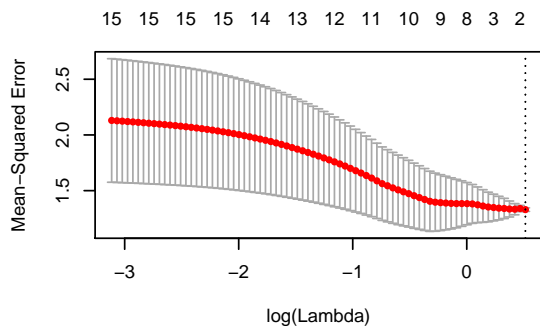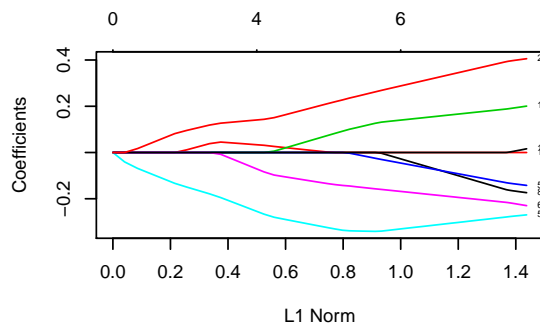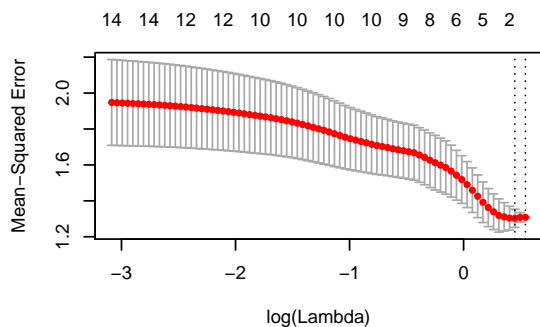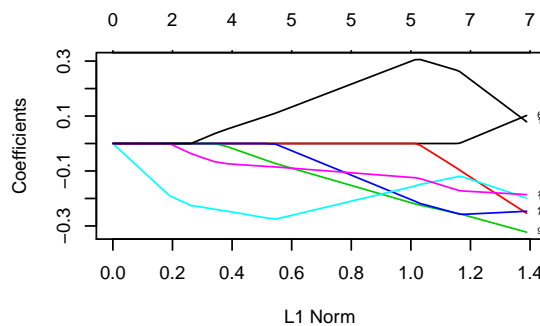

10 genes selected at time 0

Jak-STAT genes no fold change

**(a) Score plot**  
time point 0

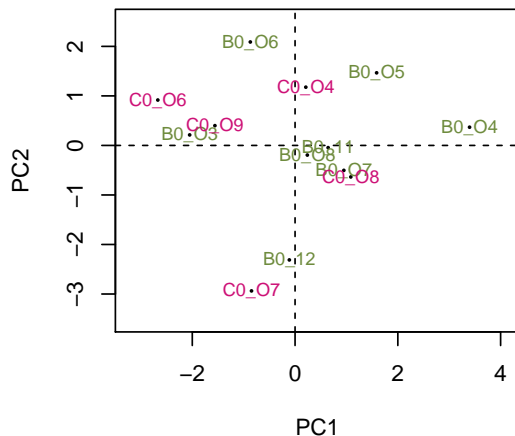

**(b) Loading plot**  
time point 0

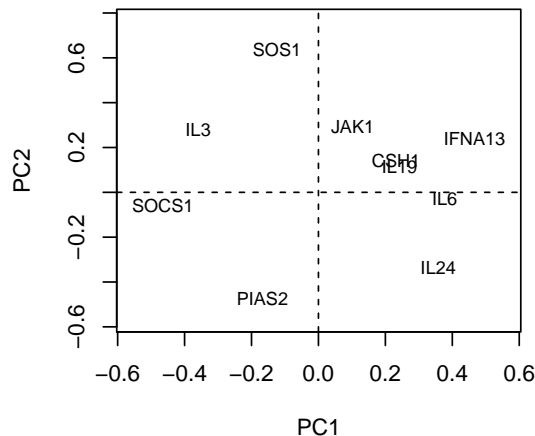

**(a) Score plot**  
time point 2

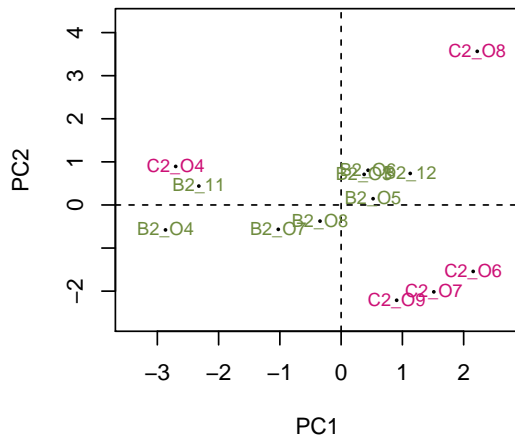

**(b) Loading plot**  
time point 2

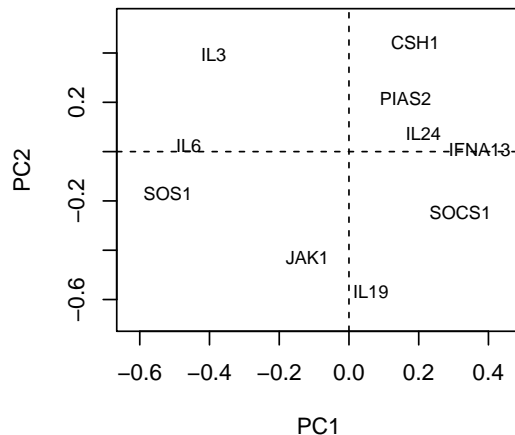

10 genes selected at time 0
