# Supplementary material for: Gene Expression Response in Peripheral Blood Cells of Petroleum Workers Exposed to Sub-Ppm Benzene Levels
Source: MDPI journal article supplement (doi:10.3390/ijerph15112385), 2018-10-27
Supplement: s1 [file s1]

# Analysis of Jak-STAT pathway genes with fold change

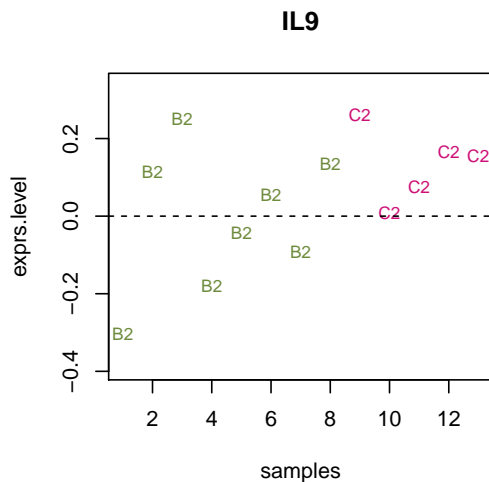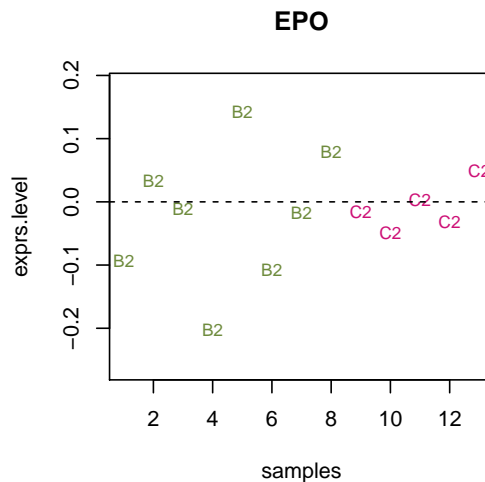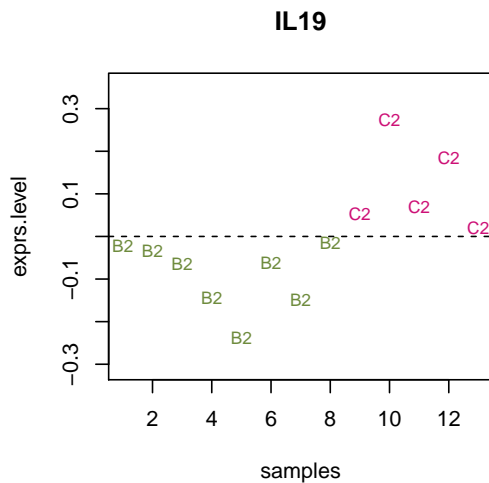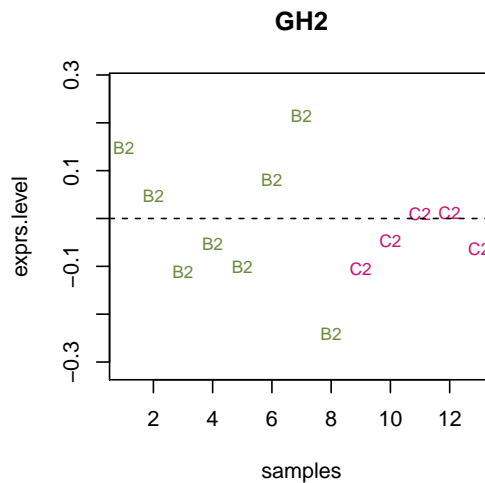

Plots of expression in all workers at time 2 of individual transcripts selected by Elastic Net at time 2

Analysis of Jak-STAT pathway genes with fold change

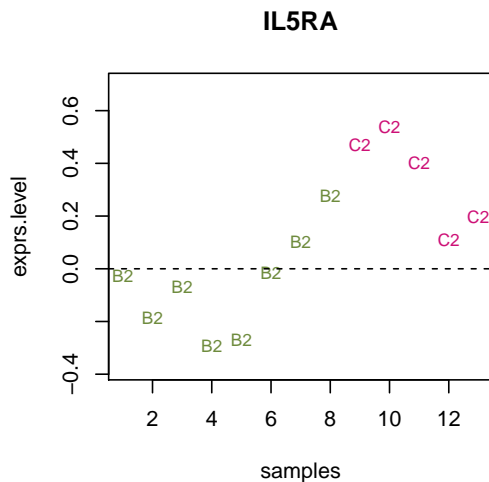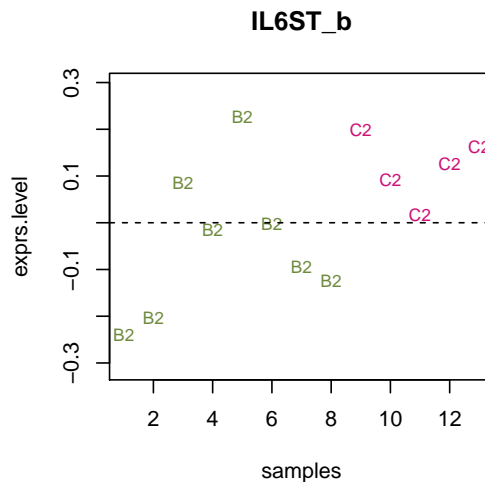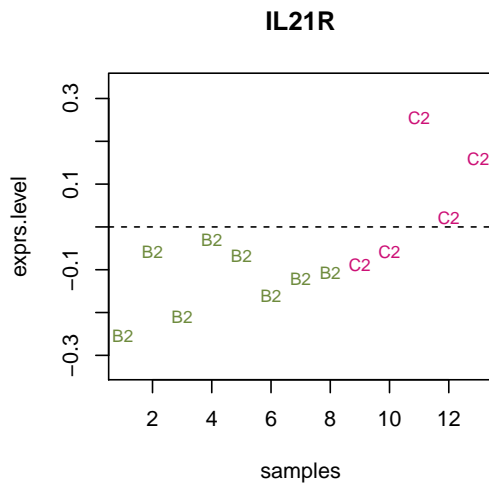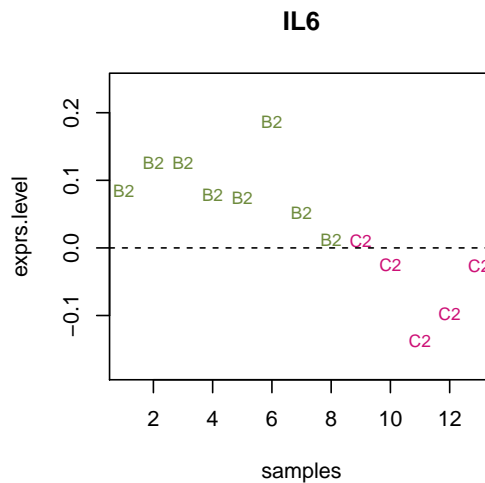

Plots of expression at time 2 in all workers of individual transcripts selected at time 2

Analysis of Jak-STAT pathway genes with fold change

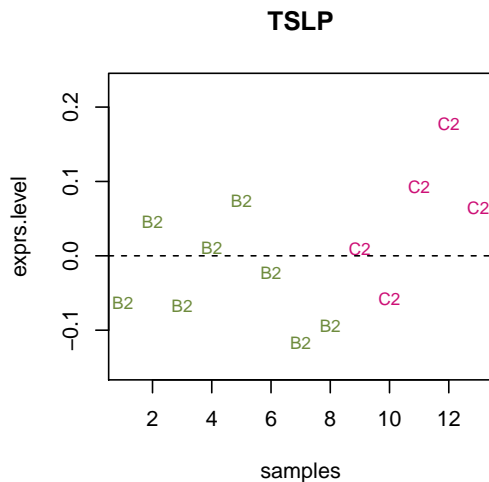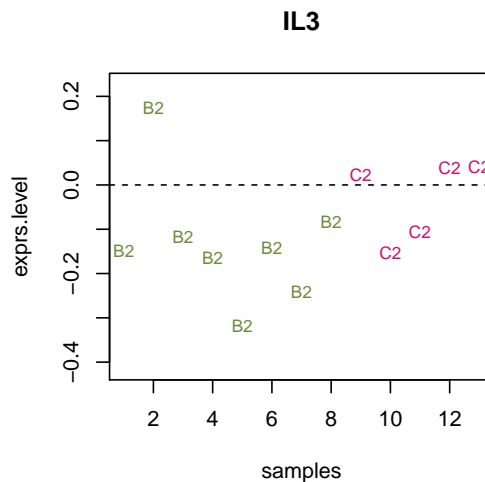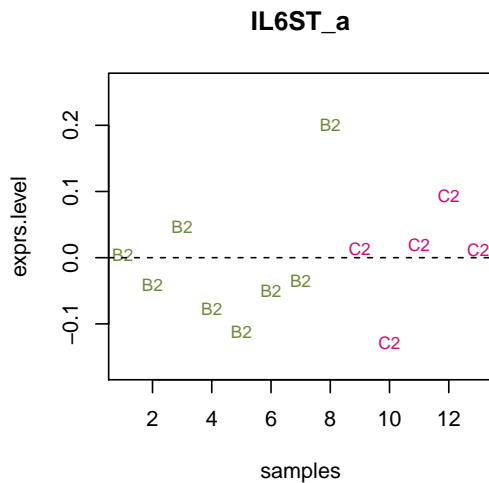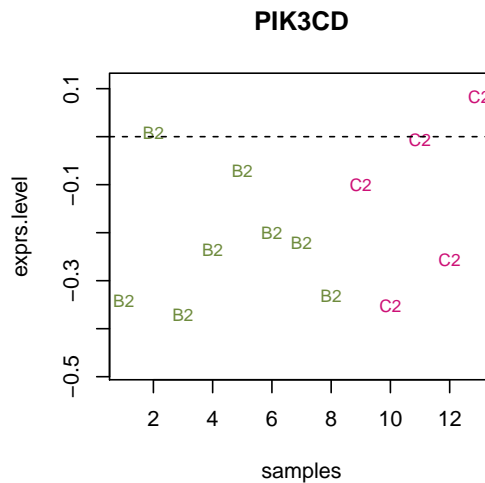

Plots of expression at time 2 in all workers of individual transcripts selected at time 2

Analysis of Jak-STAT pathway genes with fold change

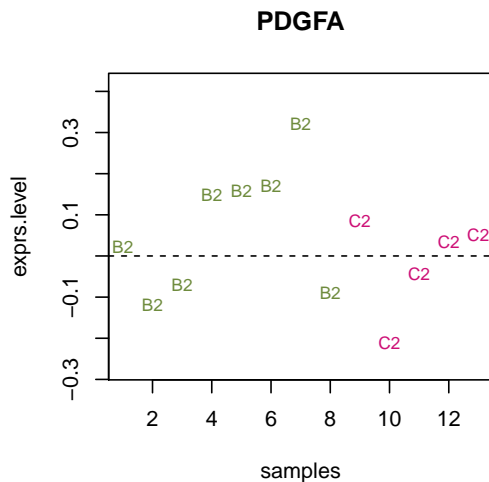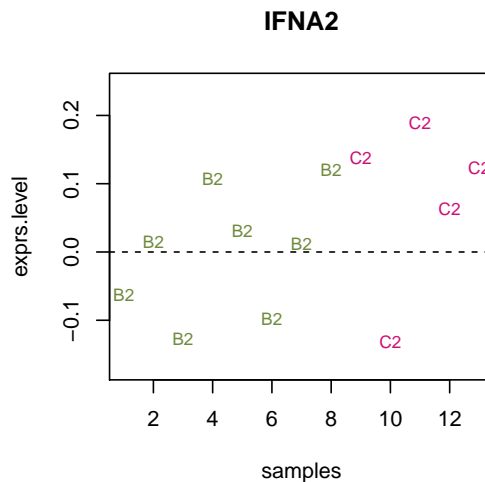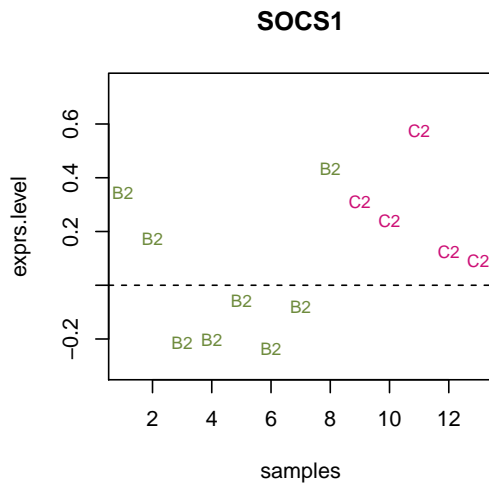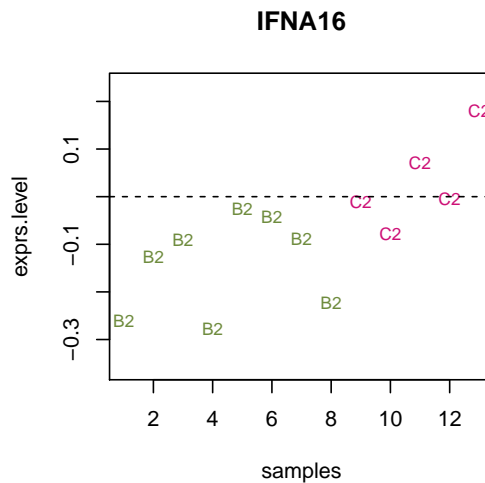

Plots of expression at time 2 in all workers of individual transcripts selected at time 2
