# Supplementary material for: Gene Expression Response in Peripheral Blood Cells of Petroleum Workers Exposed to Sub-Ppm Benzene Levels
Source: MDPI journal article supplement (doi:10.3390/ijerph15112385), 2018-10-27
Supplement: s1 [file s1]

# Analysis of Jak-STAT genes without fold change

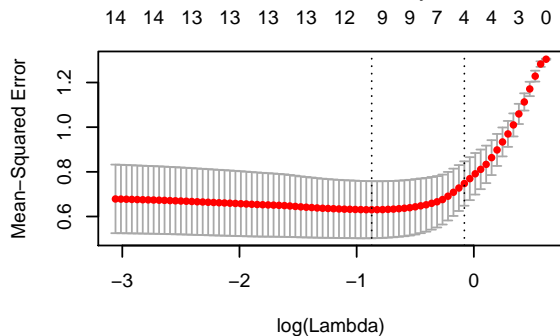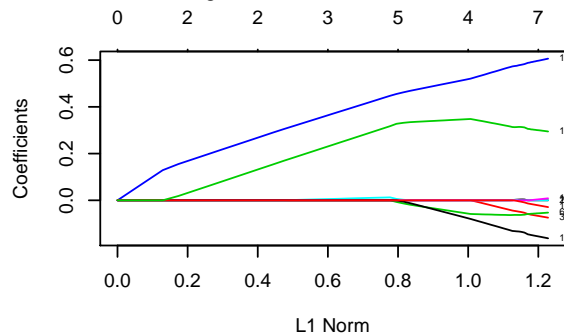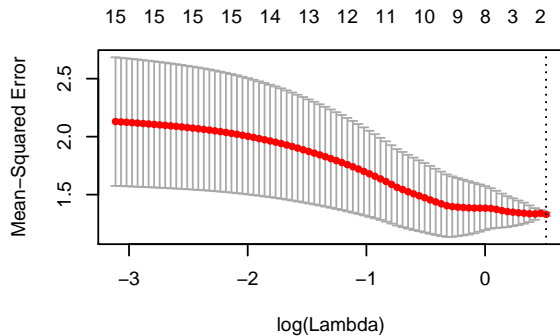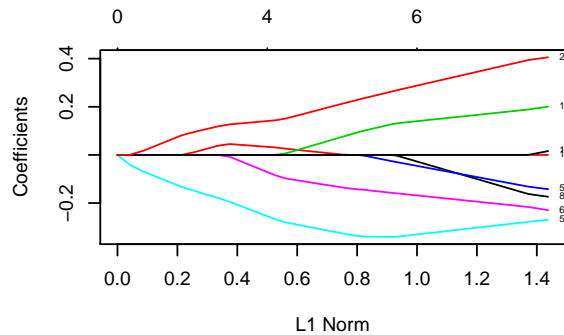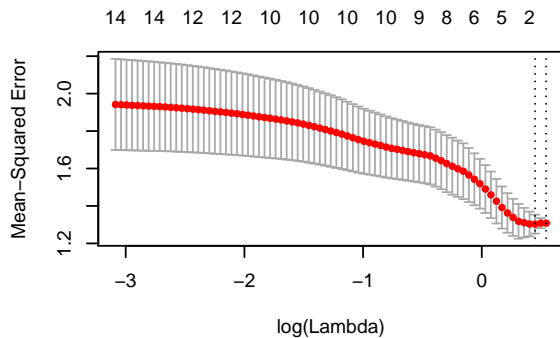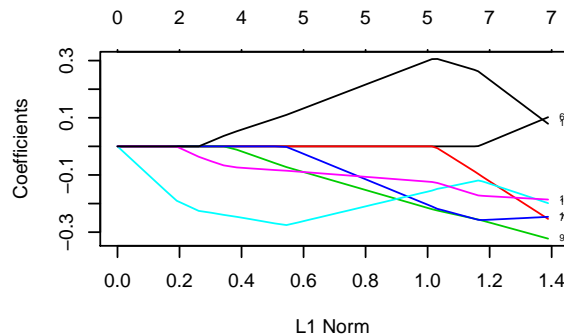

Elastic net results at time0 (top), 1 (middle) and 2 (bottom).  
Left: Cross validation curves. Right: Coefficients for individual transcripts.

Analysis of Jak-STAT genes without fold change

**(a) Score plot**  
time point 0

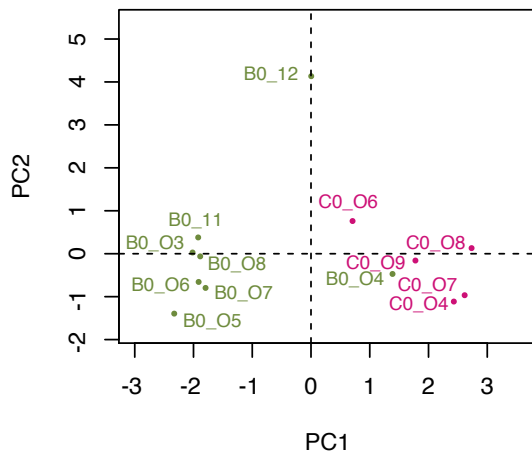

**(b) Loading plot**  
time point 0

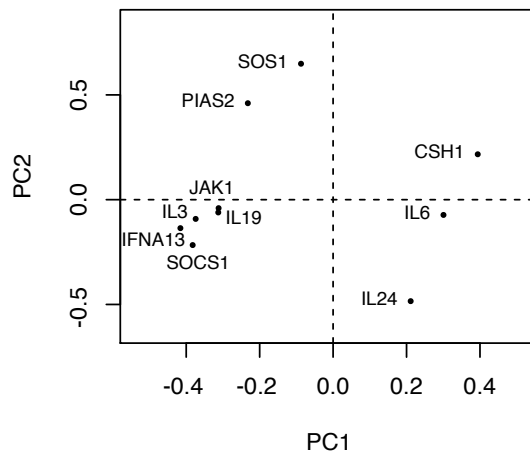

**(a) Score plot**  
time point 2

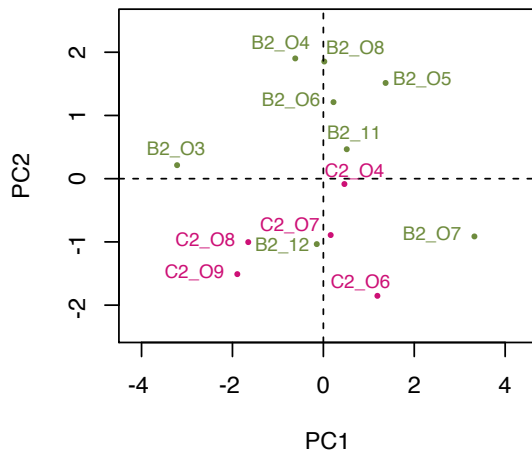

**(b) Loading plot**  
time point 2

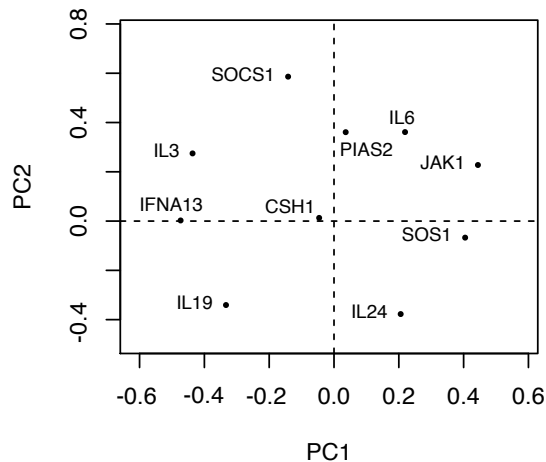

PCA of transcripts selected by Elastic Net at time 0 plotted at time 0 (top) and time 2 (bottom).

Analysis of Jak-STAT genes without fold change

**IL19**

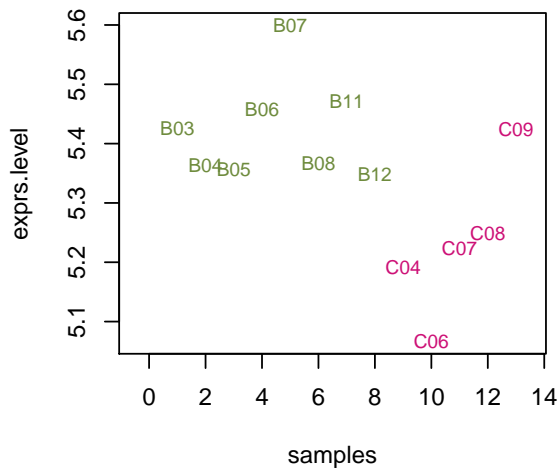

**IL24**

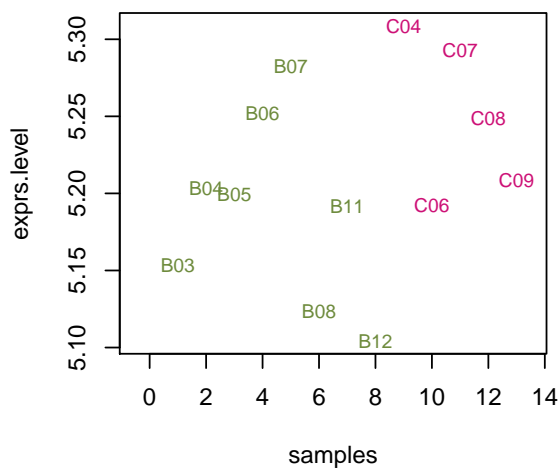

**CSH1**

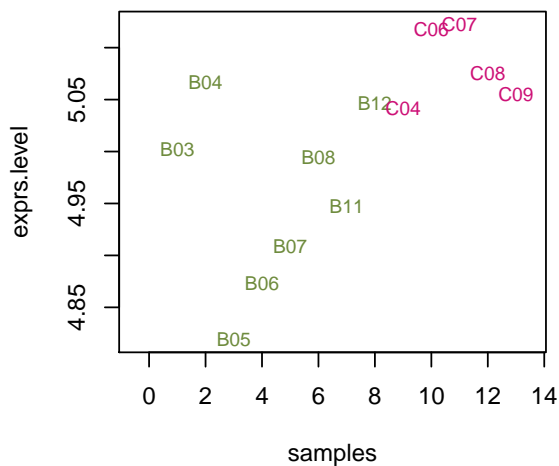

**SOS1**

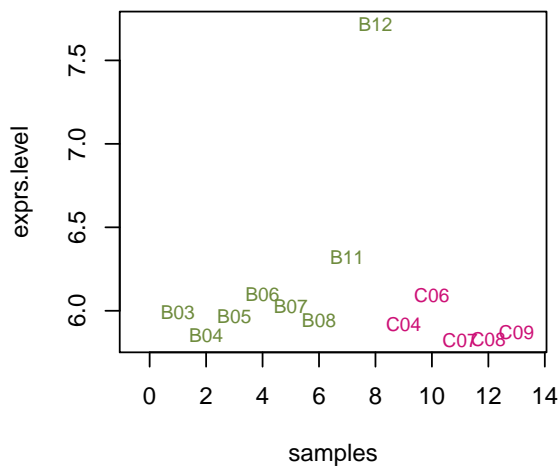

Plots of expression in all workers at time 0 for transcripts selected by Elastic Net at time 0

Analysis of Jak-STAT genes without fold change

**IL6**

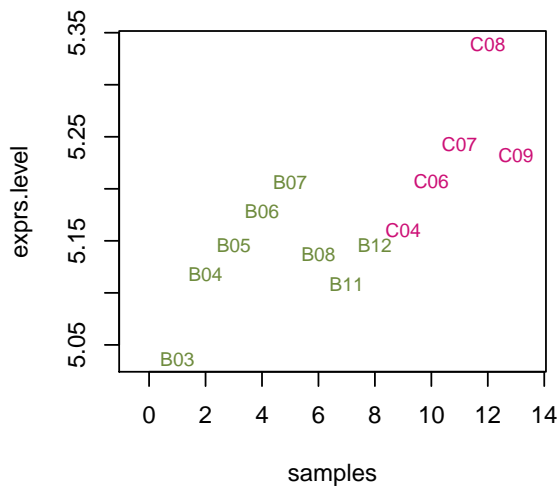

**IL3**

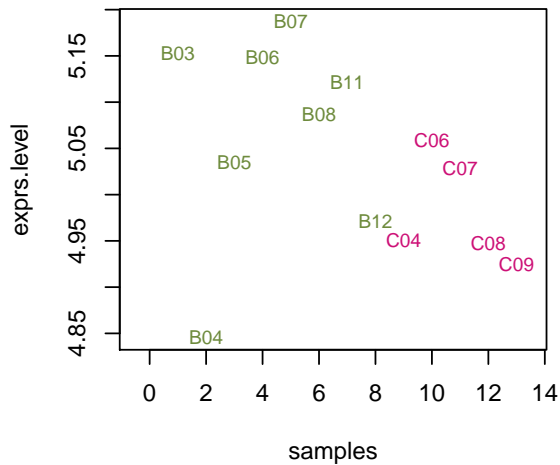

**IFNA13**

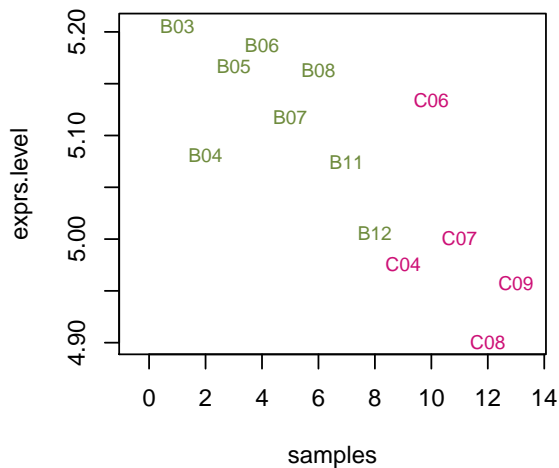

**PIAS2**

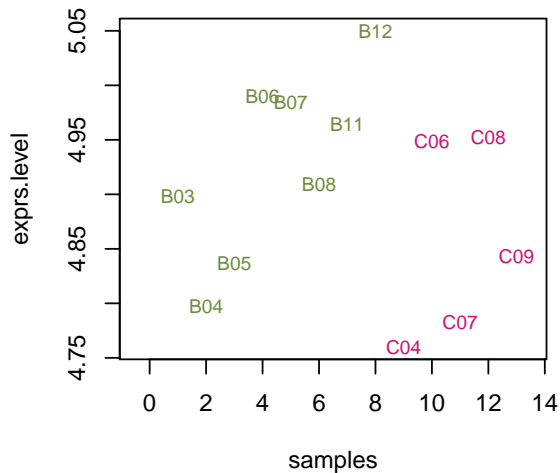

Analysis of Jak-STAT genes without fold change

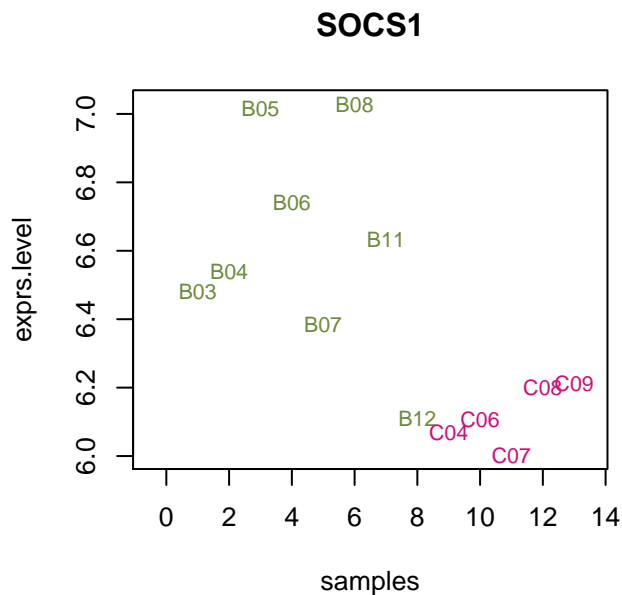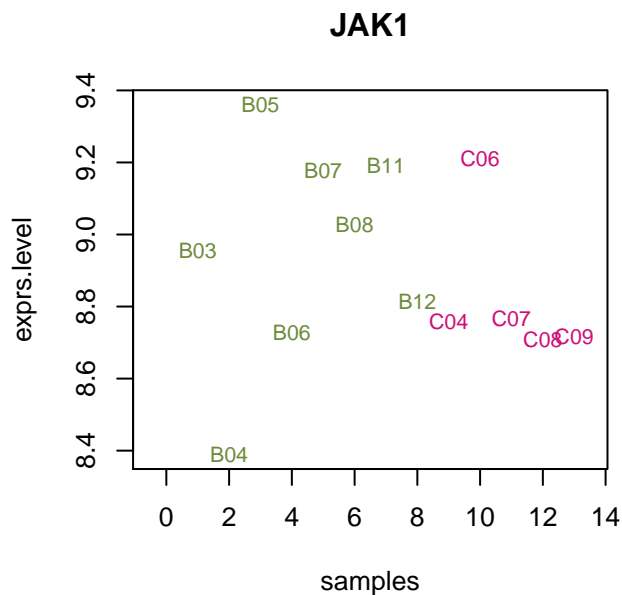

Plots of expression in all workers at time 0 for transcripts selected by Elastic Net at time 0

# Analysis of Jak-STAT genes without fold change

## IL15

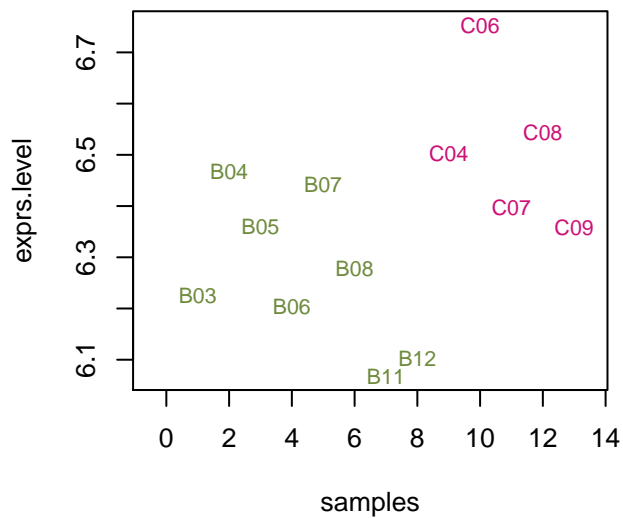

## EPOR

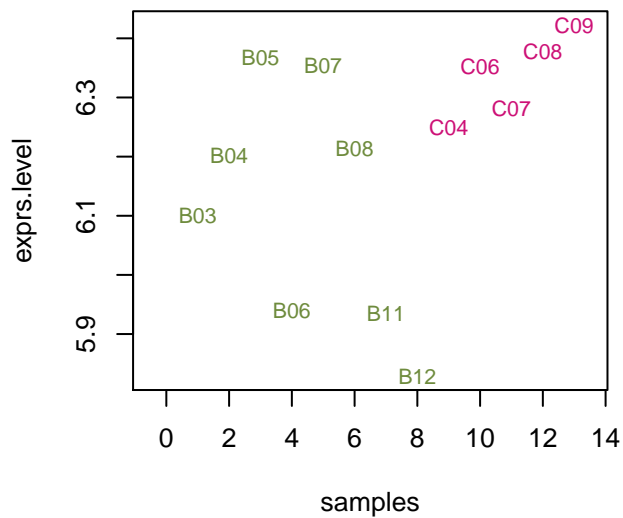

Plots of expression in all workers at time 2 for transcripts selected by Elastic Net at time 2
