# Supplementary material for: Gene Expression Response in Peripheral Blood Cells of Petroleum Workers Exposed to Sub-Ppm Benzene Levels
Source: MDPI journal article supplement (doi:10.3390/ijerph15112385), 2018-10-27
Supplement: s1 [file s1]

Average gene expression without fold change with time in genes selected by Elastic Net in data with fold change

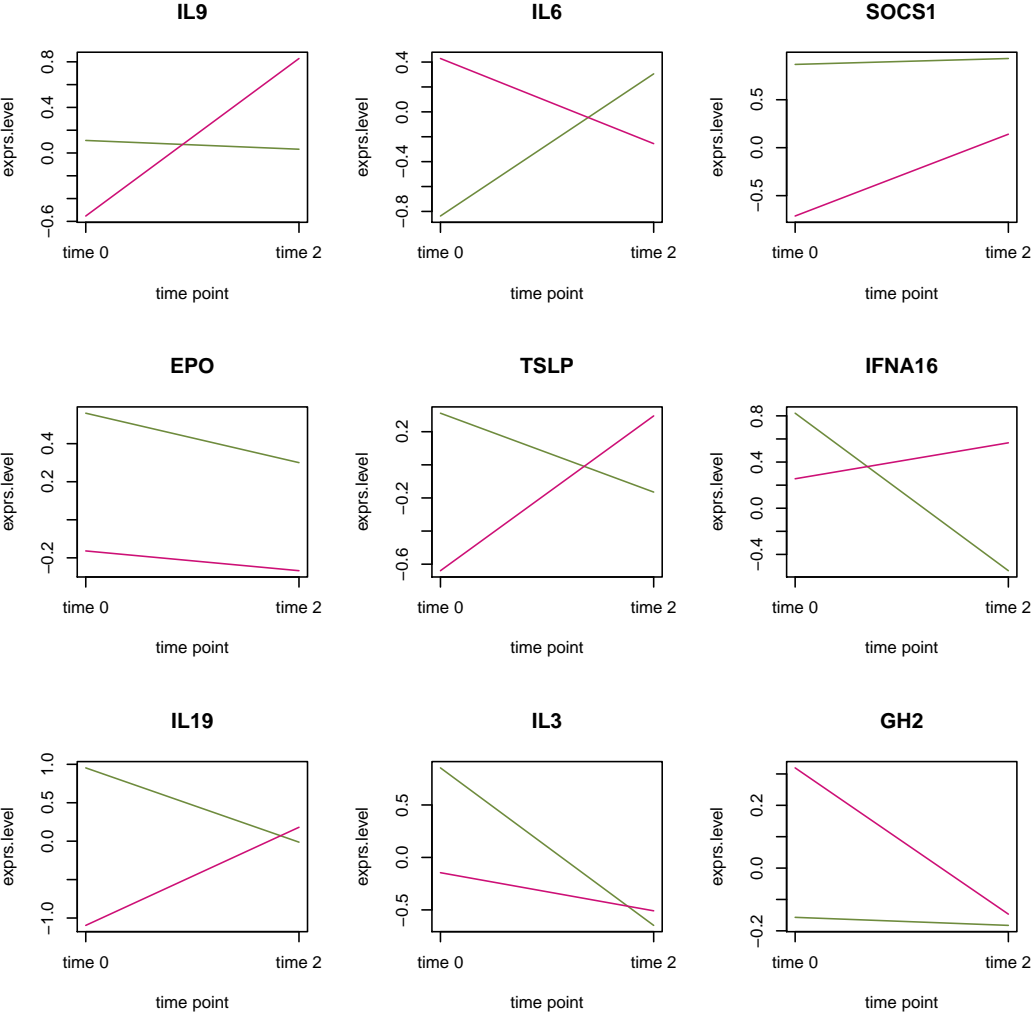

Green: Exposed workers, Pink: Referents

Average gene expression without fold change with time in 20 genes selected by Elastic Net in data with fold change

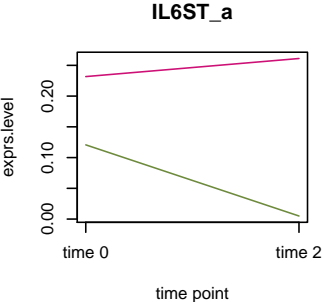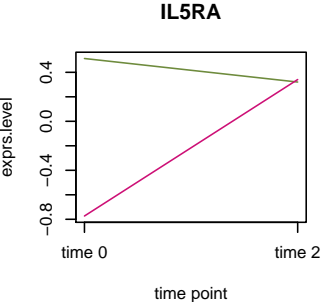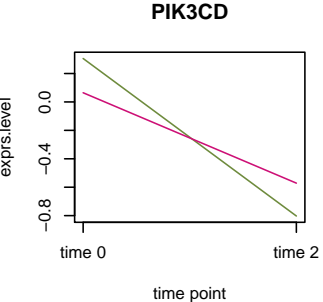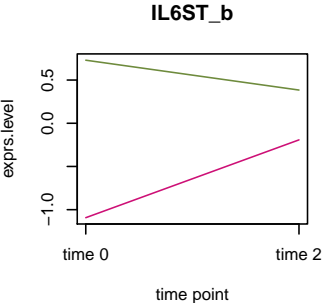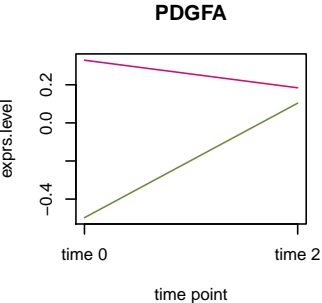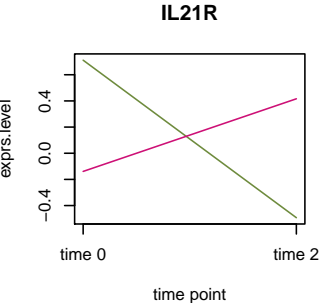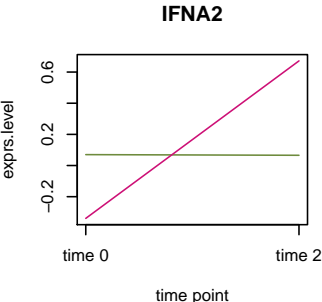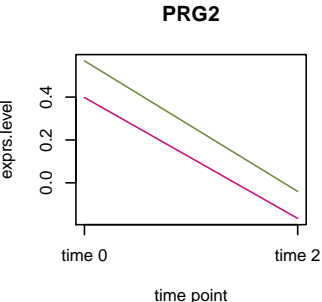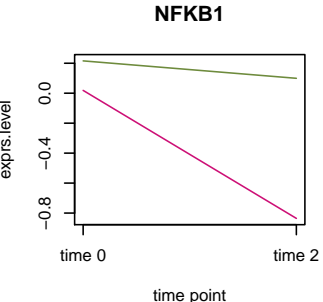

Green: Exposed workers, Pink: Referents

Average gene expression without fold change with time in 20 genes selected by Elastic Net in data with fold change

**IFNB1**

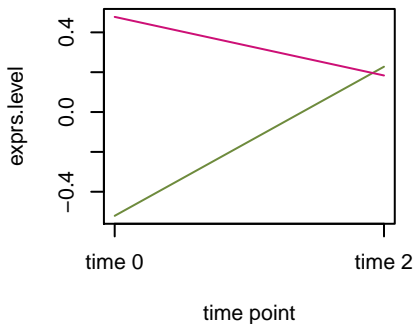

**ACSL1**

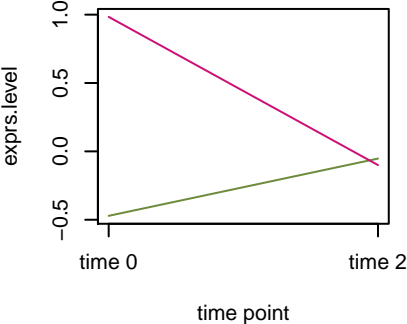

**CLEC5A**

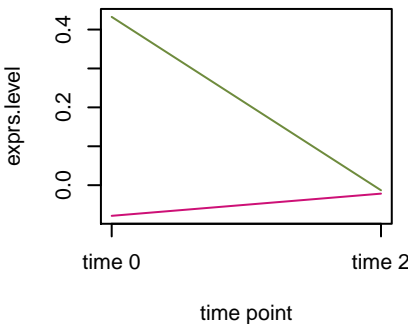

**AQP9**

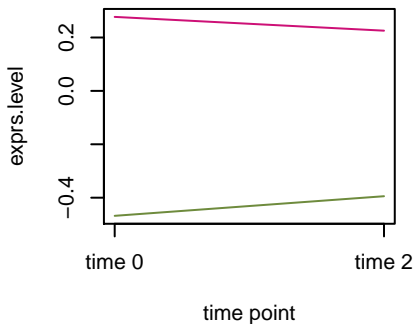

Green: Exposed workers, Pink: Referents
