# Supplementary material for: Gene Expression Response in Peripheral Blood Cells of Petroleum Workers Exposed to Sub-Ppm Benzene Levels
Source: MDPI journal article supplement (doi:10.3390/ijerph15112385), 2018-10-27
Supplement: s1 [file s1]

Analysis of 6 China (Schiffman) marker genes with fold change

**PRG2**

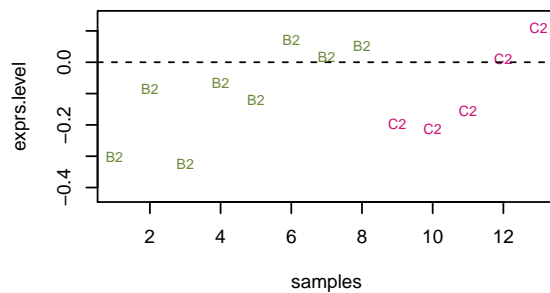

**NFKB1**

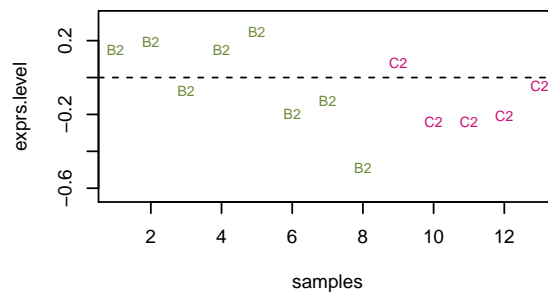

**IFNB1**

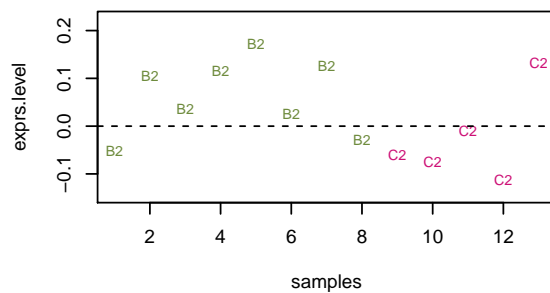

**ACSL1**

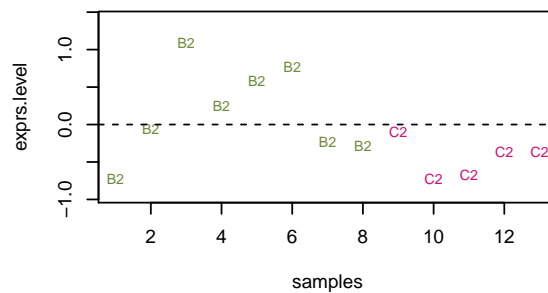

**CLEC5A**

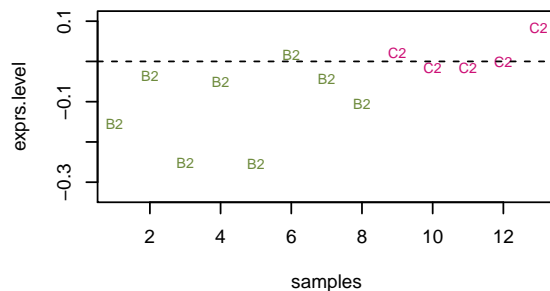

**AQP9**

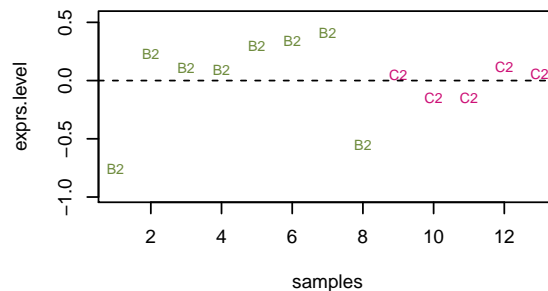

Plots of the expression of all 6 transcripts in all workers at time 2.
