# Supplementary material for: Gene Expression Response in Peripheral Blood Cells of Petroleum Workers Exposed to Sub-Ppm Benzene Levels
Source: MDPI journal article supplement (doi:10.3390/ijerph15112385), 2018-10-27
Supplement: s1 [file s1]

Confidence intervals (CI) of selected genes

### CI of diff= B-C, UnFold time 0

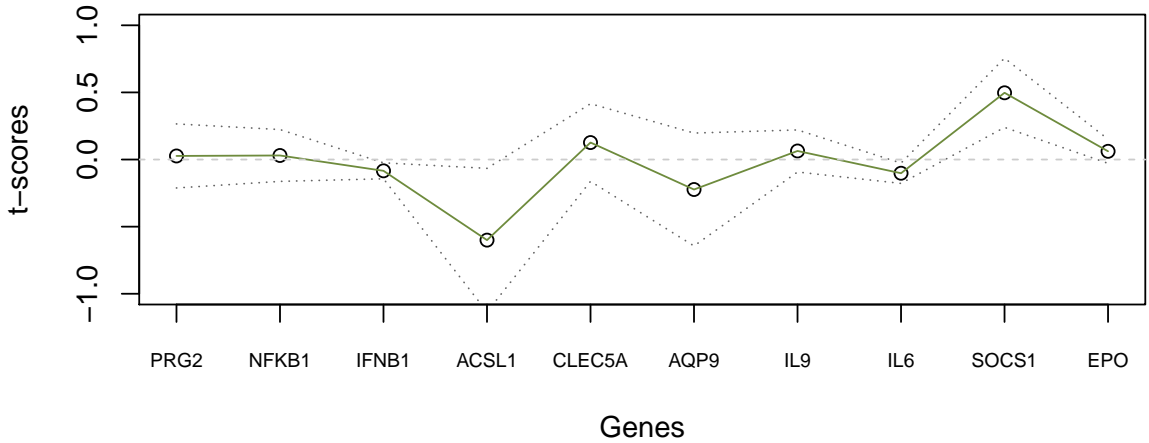

### CI of diff= B-C, Fold time 2

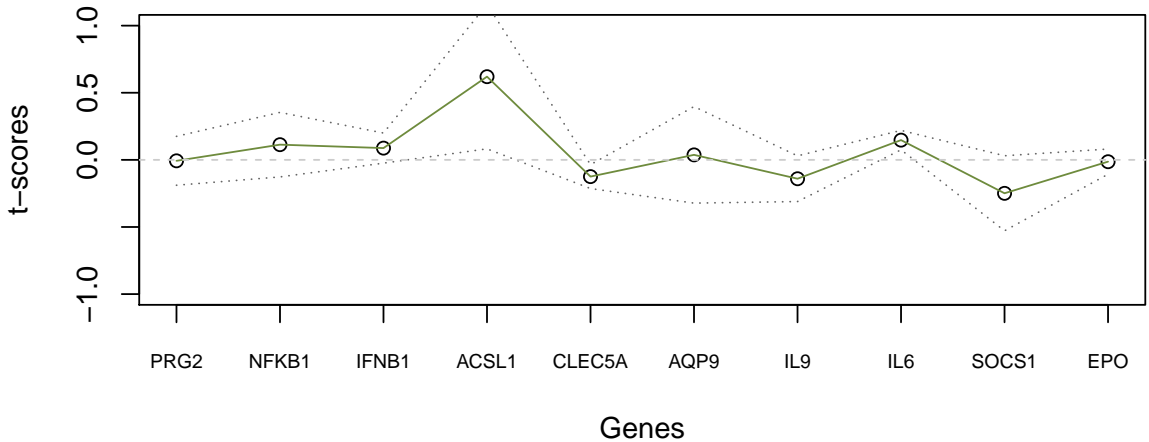

based on difference in average gene expression (workers - referents) without fold change
