# Supplementary material for: Gene Expression Response in Peripheral Blood Cells of Petroleum Workers Exposed to Sub-Ppm Benzene Levels
Source: MDPI journal article supplement (doi:10.3390/ijerph15112385), 2018-10-27

Gene plots of best pairwise markers in data with fold change

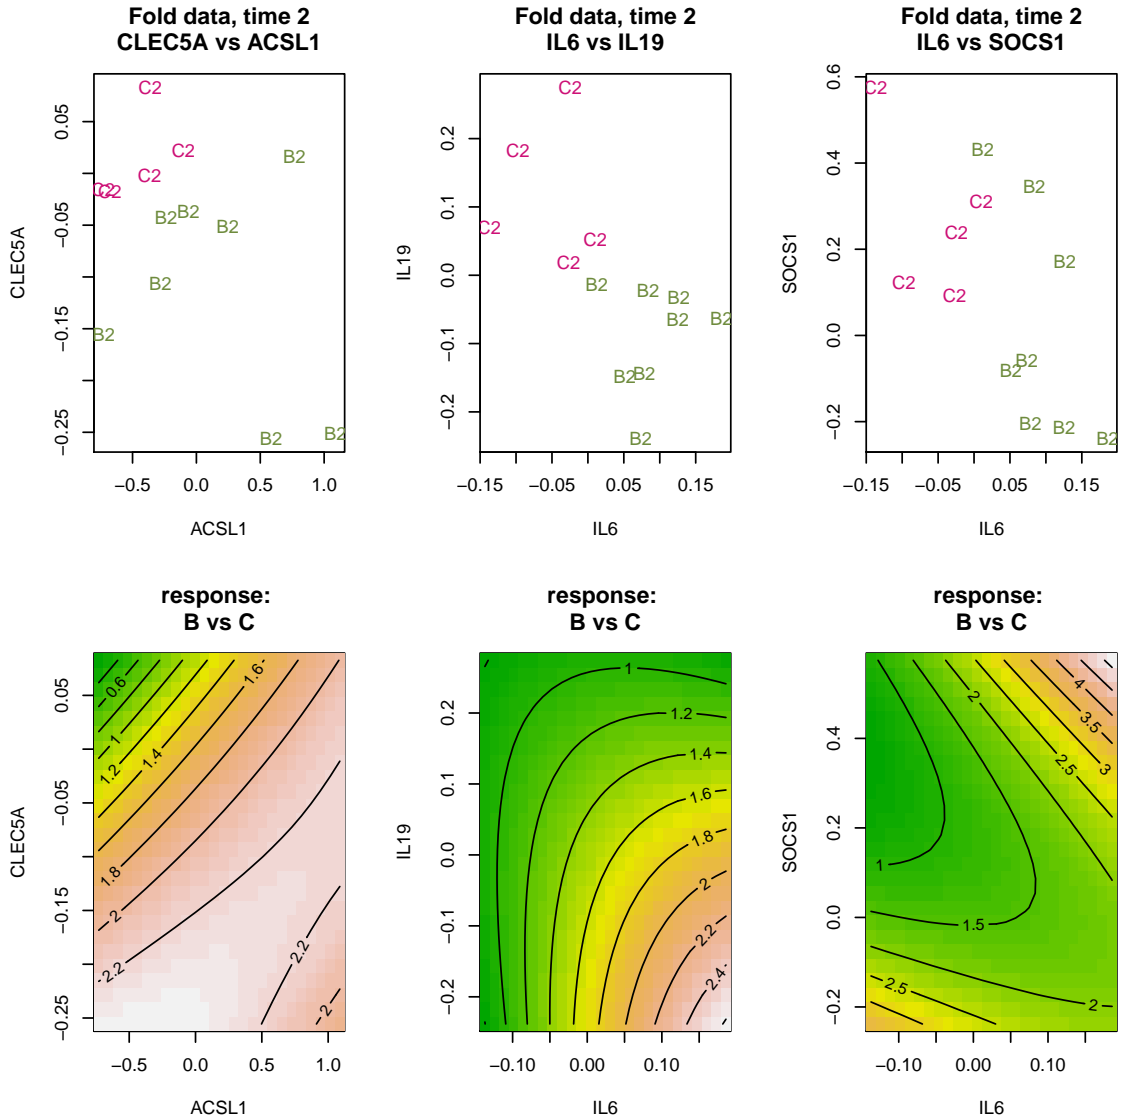

Plots of gene expression in all workers with fold change at time 2

Top: Pairwise plots Bottom: Response surface models

Gene plots of best pairwise markers in data with fold change

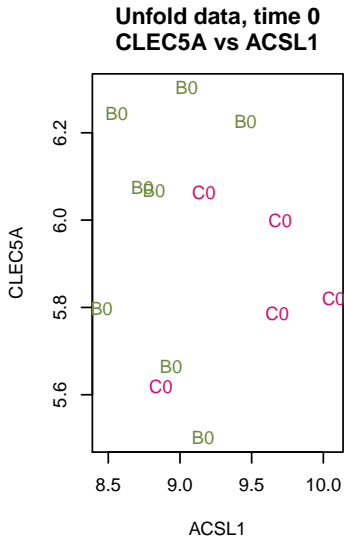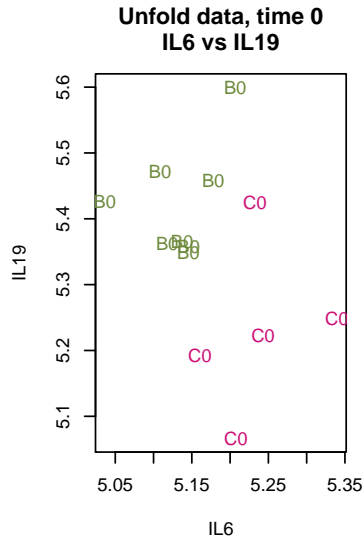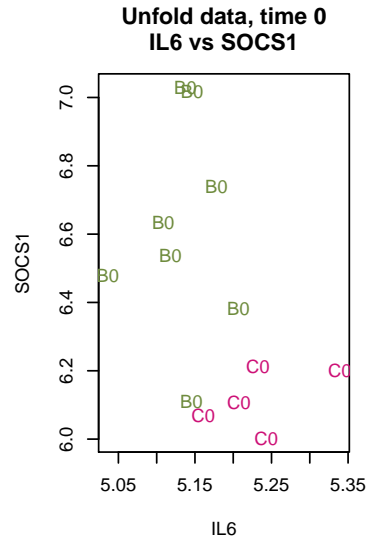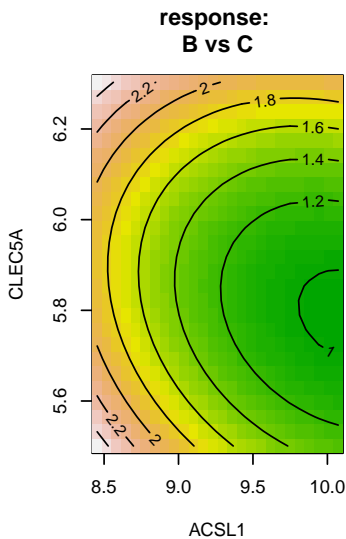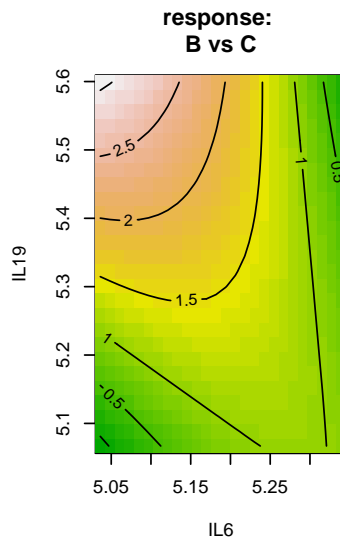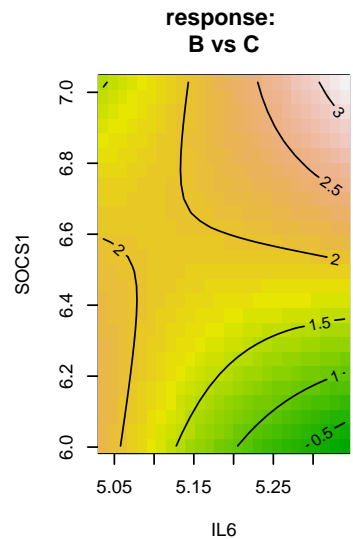

Supplement: s1 [file s1]
