# Supplementary material for: Gene Expression Response in Peripheral Blood Cells of Petroleum Workers Exposed to Sub-Ppm Benzene Levels
Source: MDPI journal article supplement (doi:10.3390/ijerph15112385), 2018-10-27
Supplement: s1 [file s1]

Analysis of 6 China (Schiffman) marker genes with fold change

**(a) Score plot  
time point 1**

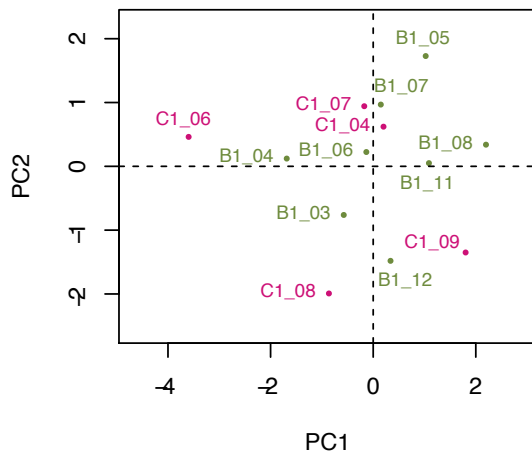

**(b) Loading plot  
time point 1**

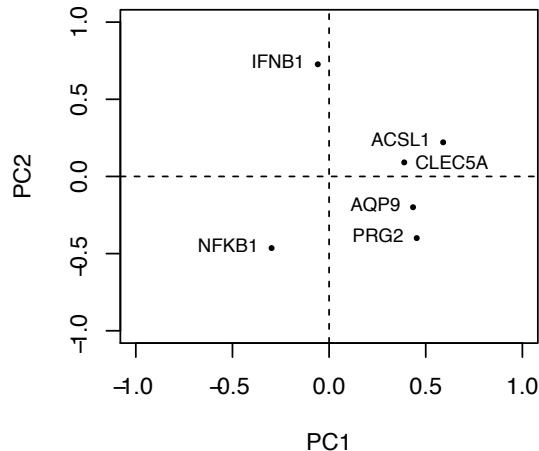

**(c) Score plot  
time point 2**

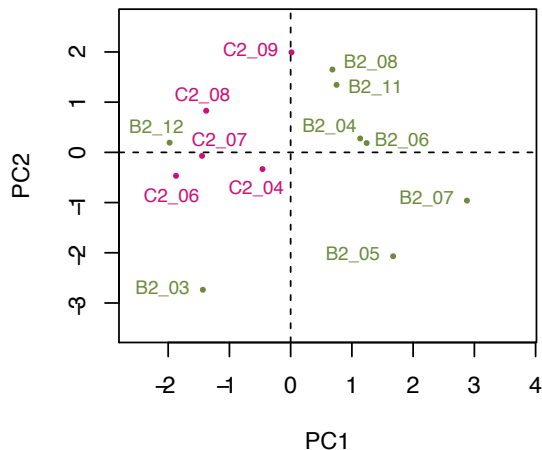

**(d) Loading plot  
time point 2**

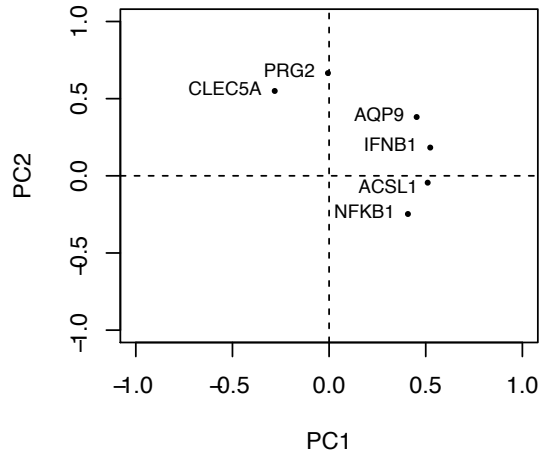

PCA of all six genes at time 1 (top) and 2 (bottom).  
Left: Scores (workers) Right: Loadings (genes)
