# Supplementary material for: Gene Expression Response in Peripheral Blood Cells of Petroleum Workers Exposed to Sub-Ppm Benzene Levels
Source: MDPI journal article supplement (doi:10.3390/ijerph15112385), 2018-10-27
Supplement: s1 [file s1]

# Analysis of all 30 China (Schiffman) marker genes with fold change

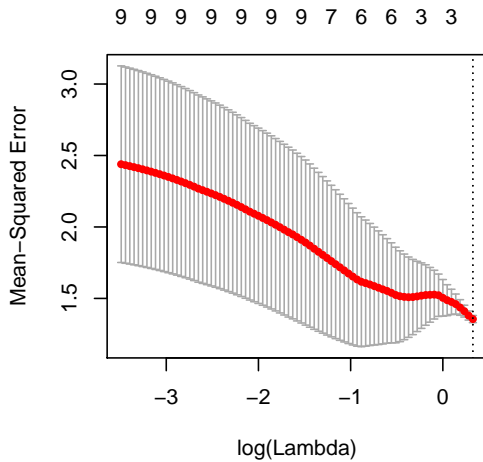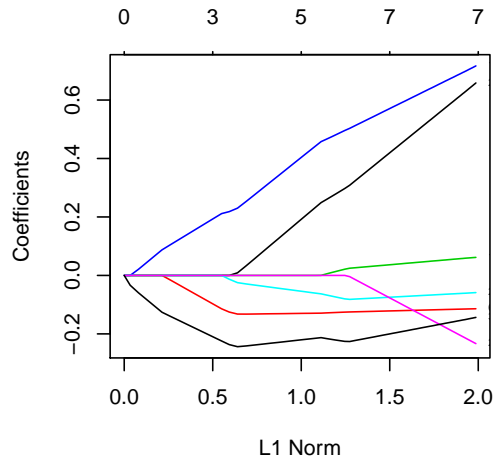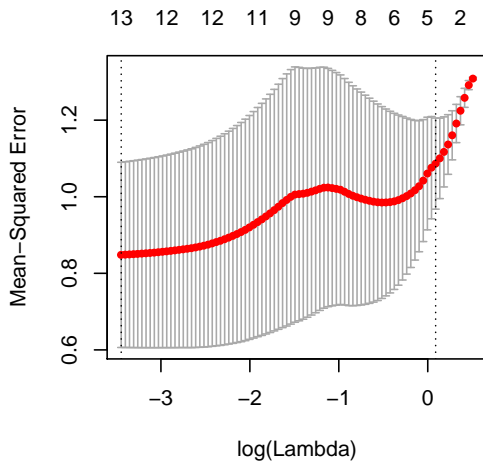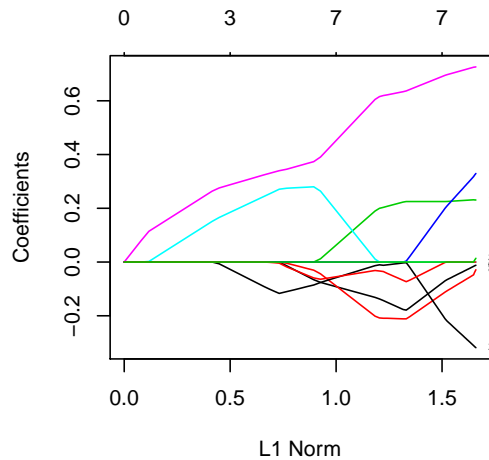

Elastic net results at time1 (top) and 2 (bottom).  
Left: Cross validation curves. Right: Coefficients for individual transcripts

Analysis of all 30 China (Schiffman) marker genes with fold change

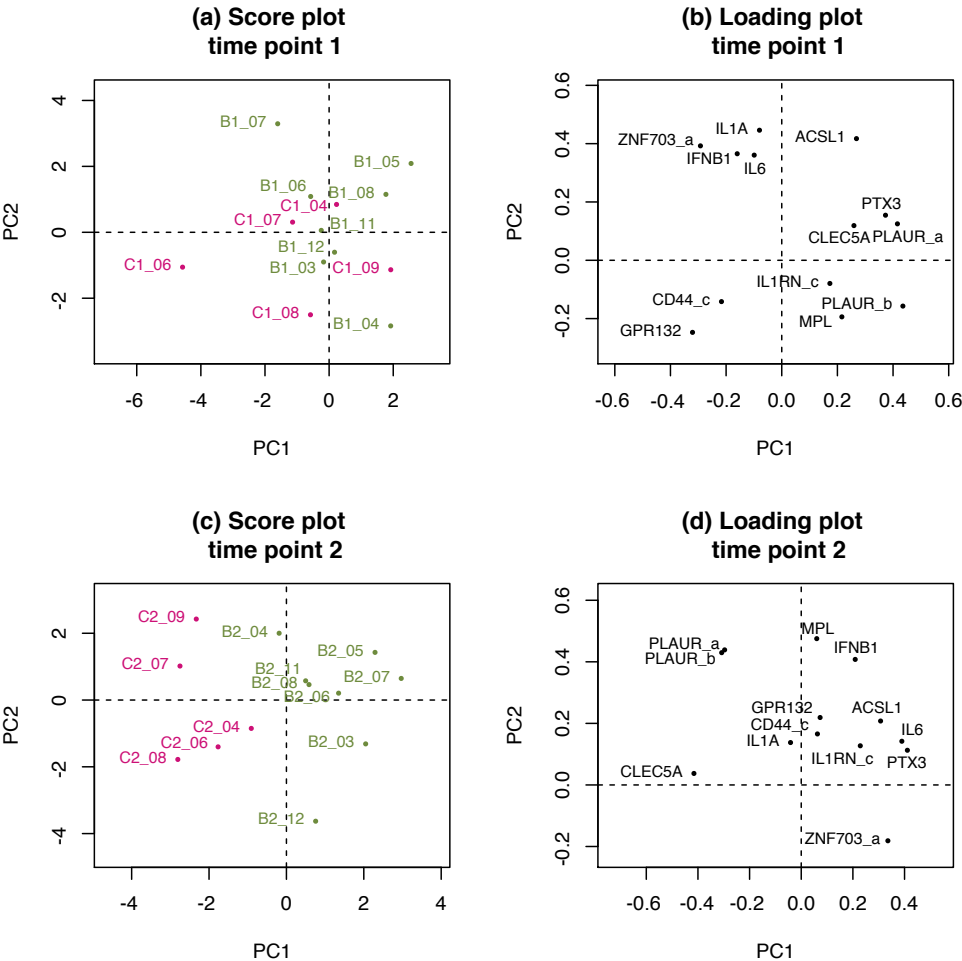

PCA of transcripts selected by Elastic Net at time 2 plotted at both time 1 (top) and time 2 (bottom)

Analysis of all 30 China (Schiffman) marker genes with fold change

### ACSL1

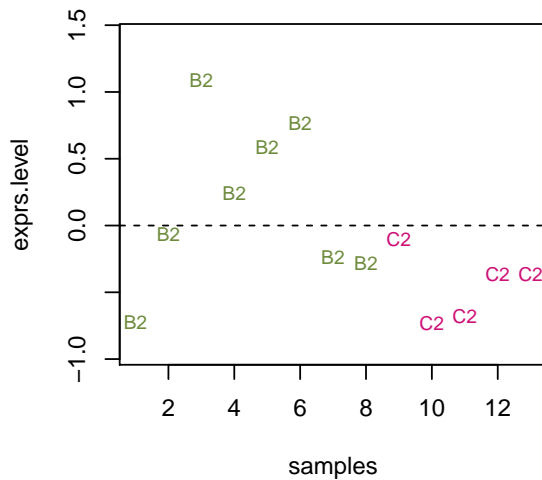

### CD44\_c

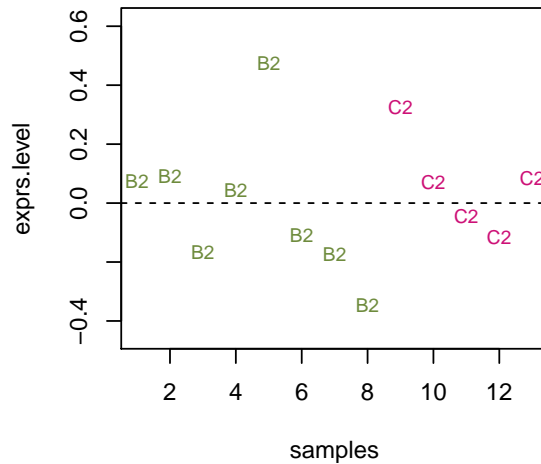

### CLEC5A

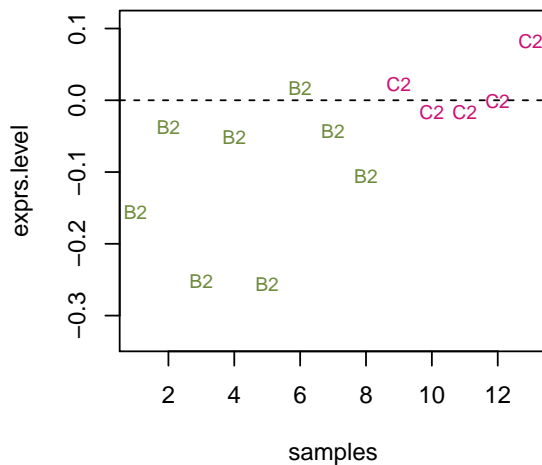

### GPR132

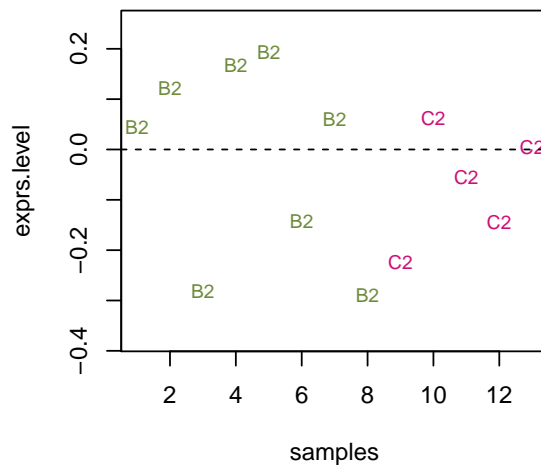

Plots of expression at time 2 in all workers  
of individual transcripts selected by Elastic Net at time 2

Analysis of all 30 China (Schiffman) marker genes with fold change

**IFNB1**

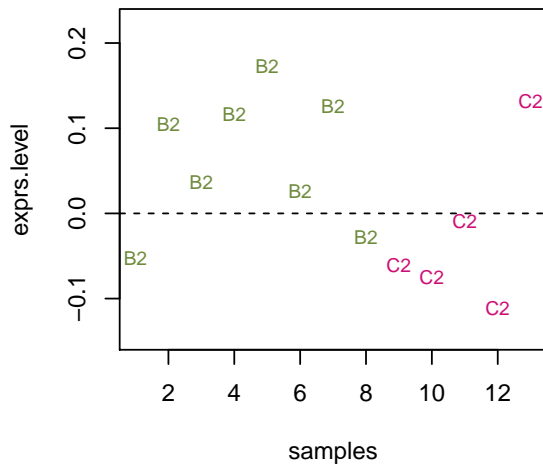

**IL1A**

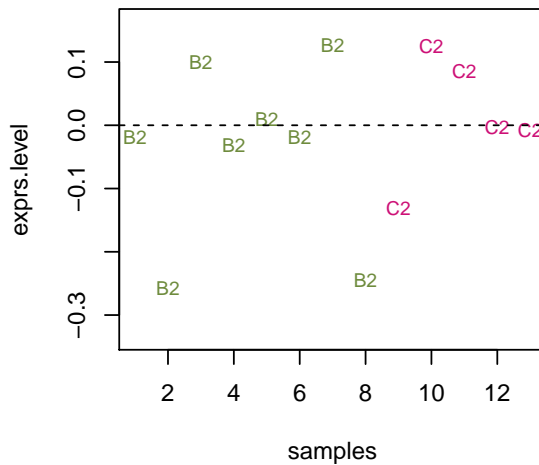

**IL1RN\_c**

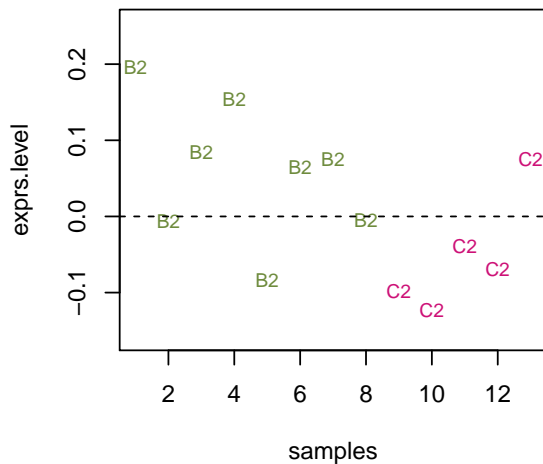

**IL6**

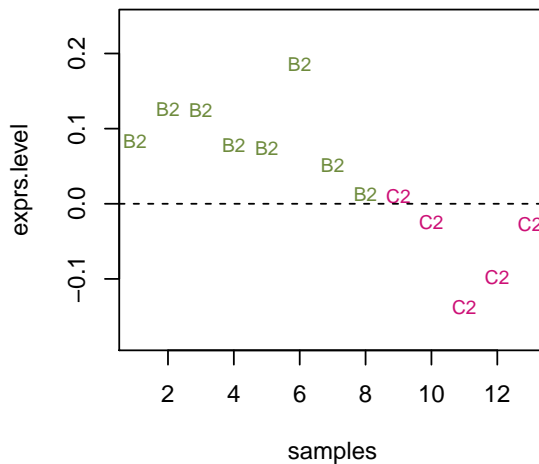

Plots of expression at time 2 in all workers  
of individual transcripts selected by Elastic Net at time 2

Analysis of all 30 China (Schiffman) marker genes with fold change

**MPL**

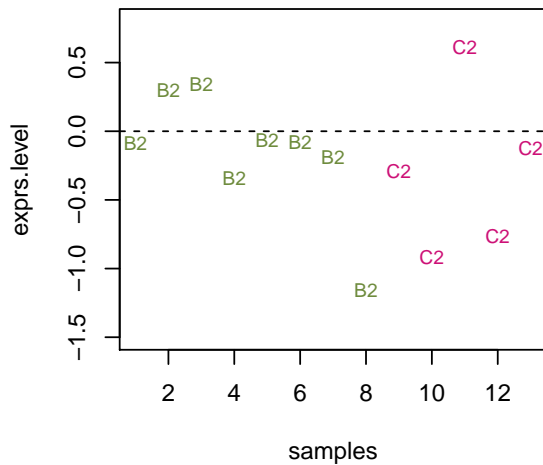

**PLAUR\_a**

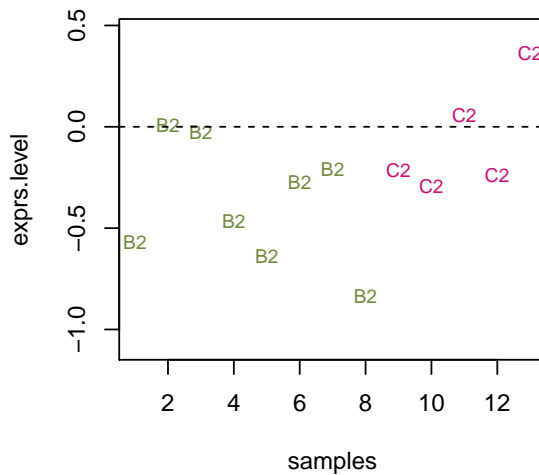

**PLAUR\_b**

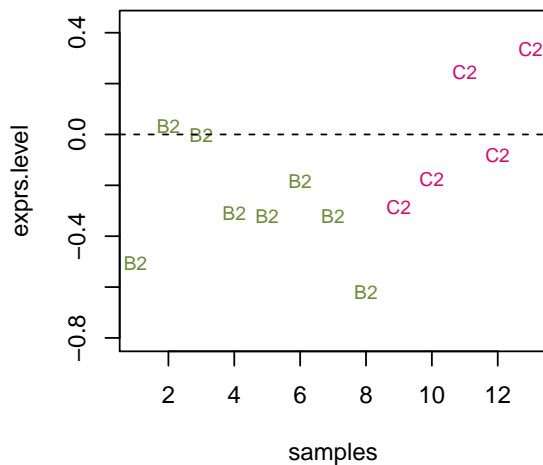

**PTX3**

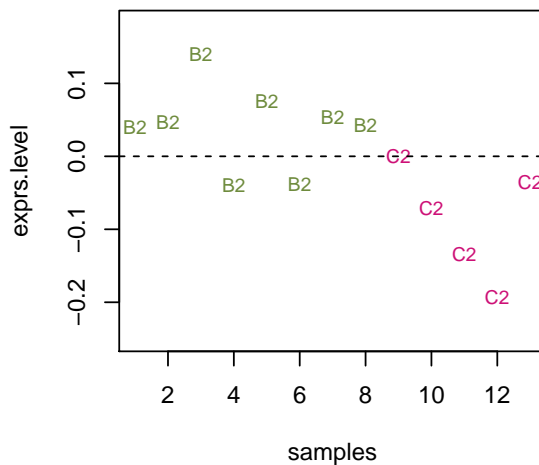

Plots of expression at time 2 in all workers  
of individual transcripts selected by Elastic Net at time 2

Analysis of all 30 China (Schiffman) marker genes with fold change

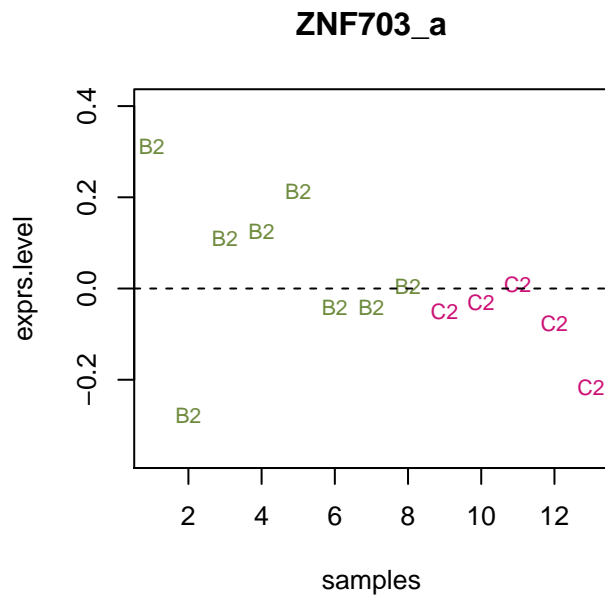

Plots of expression at time 2 in all workers  
of individual transcripts selected by Elastic Net at time 2
