# Supplementary material for: Gene Expression Response in Peripheral Blood Cells of Petroleum Workers Exposed to Sub-Ppm Benzene Levels
Source: MDPI journal article supplement (doi:10.3390/ijerph15112385), 2018-10-27
Supplement: s1 [file s1]

# Analysis of all 30 Schiffman marker genes without fold change

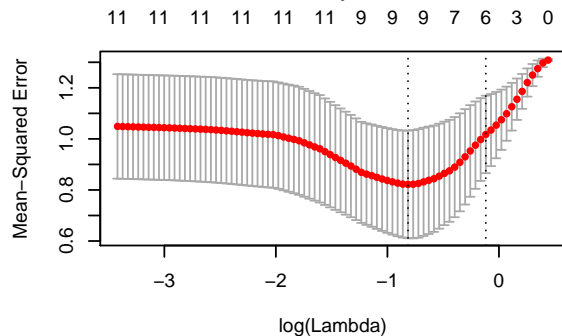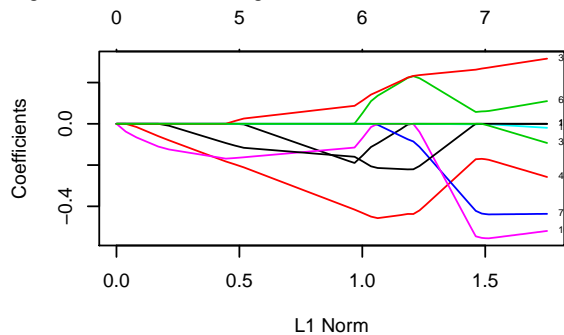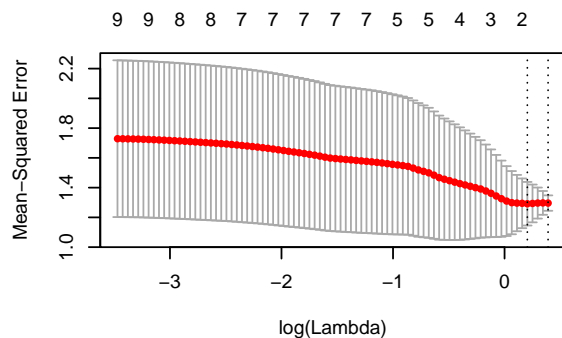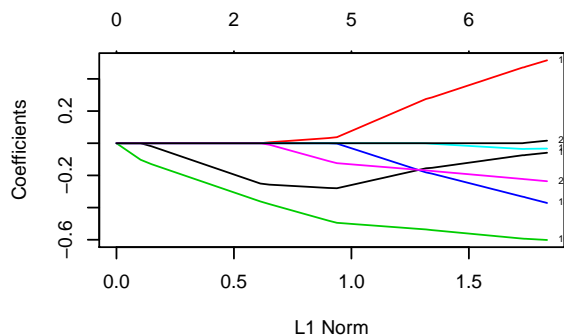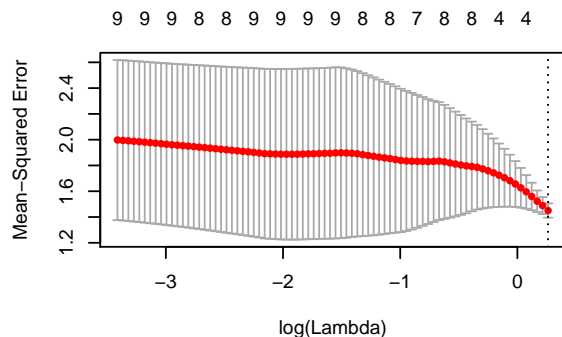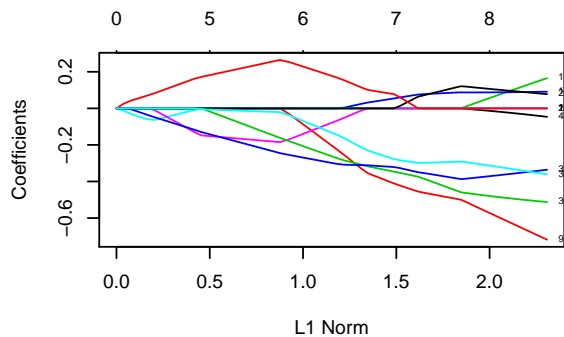

Elastic net results at time0 (top), 1 (middle) and 2 (bottom).  
Left: Cross validation curves. Right: Coefficients for individual transcripts

Analysis of all 30 Schiffman marker genes without fold change

**(a) Score plot  
time point 0**

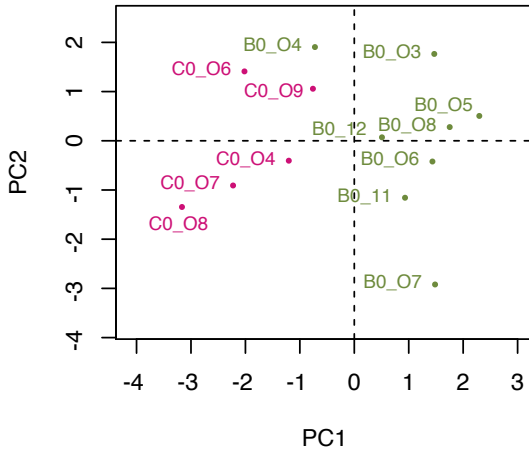

**(b) Loading plot  
time point 0**

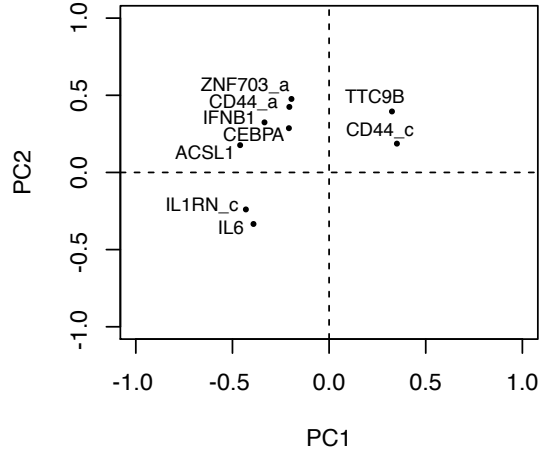

**(a) Score plot  
time point 2**

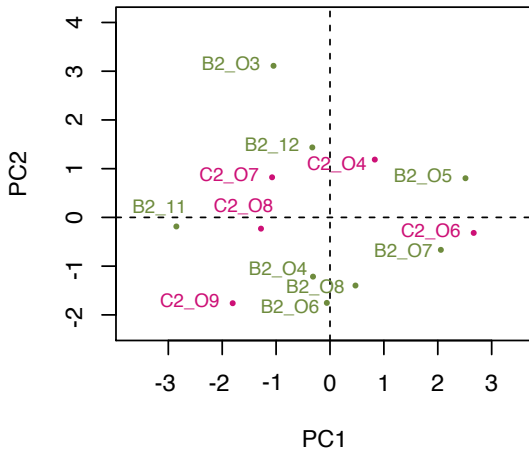

**(b) Loading plot  
time point 2**

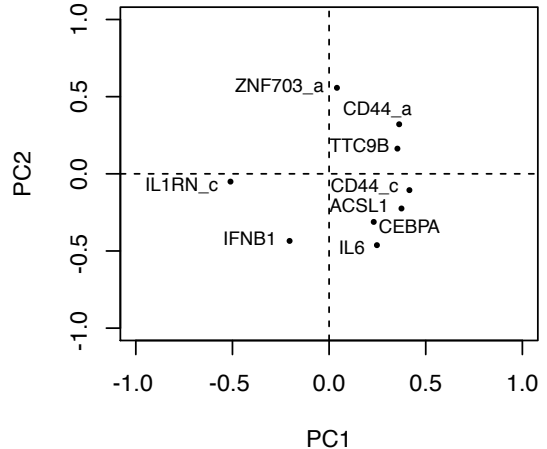

PCA of transcripts selected by Elastic Net at time 0  
plotted at both time 0 (top) and time 2 (bottom)

Analysis of all 30 Schiffman marker genes without fold change

### ACSL1

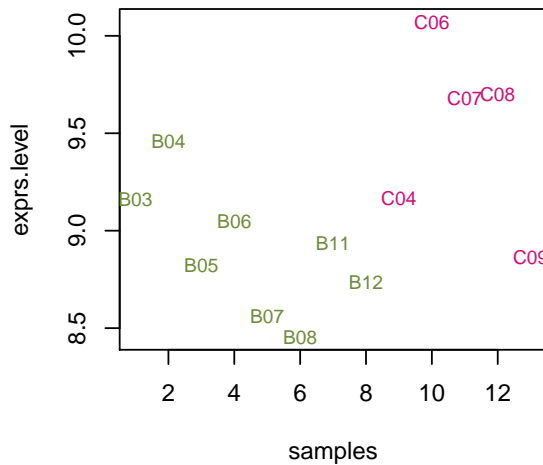

### CD44\_a

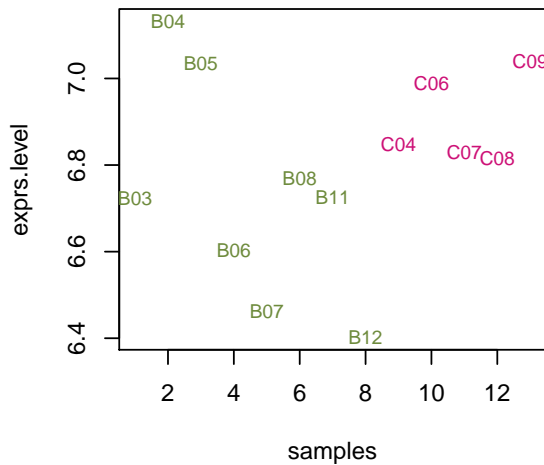

### CD44\_c

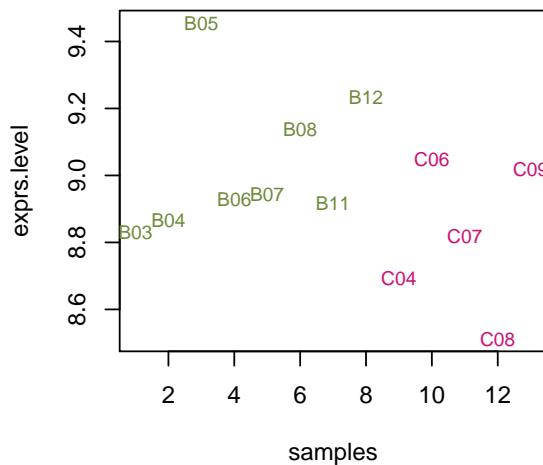

### CEBPA

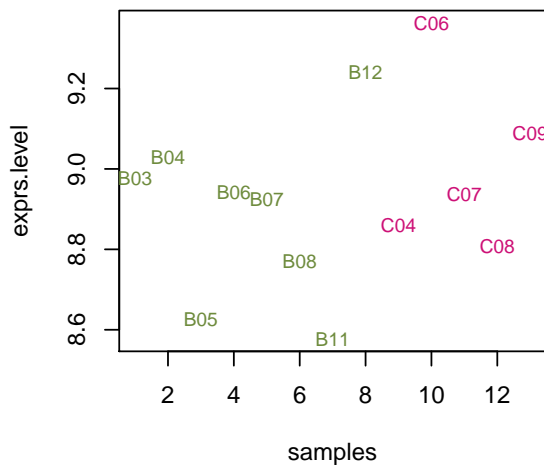

Plots of expression in all workers at time 0  
of individual transcripts selected by Elastic Net at time 0

Analysis of all 30 Schiffman marker genes without fold change

**IFNB1**

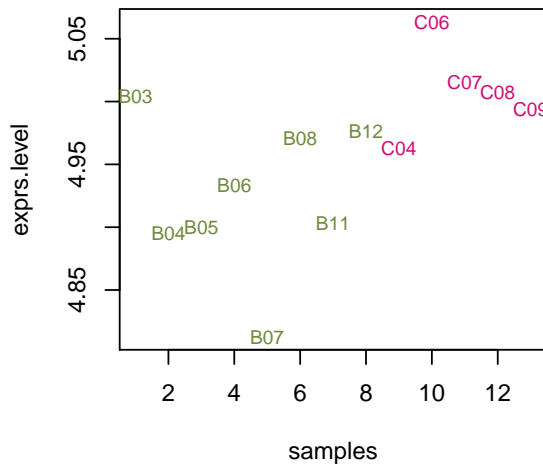

**IL1RN\_c**

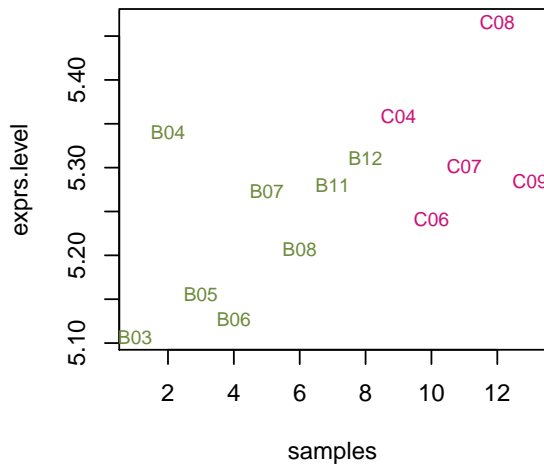

**IL6**

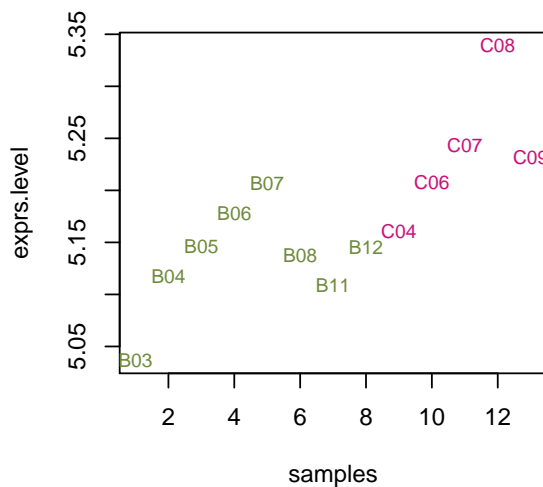

**TTC9B**

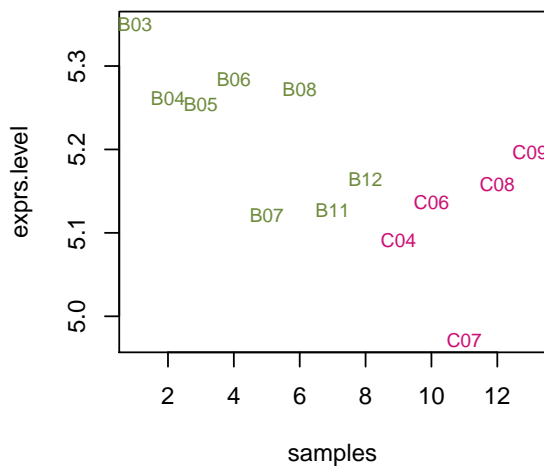

Plots of expression at time 0 in all workers  
of individual transcripts selected by Elastic Net at time 0

Analysis of all 30 Schiffman marker genes without fold change

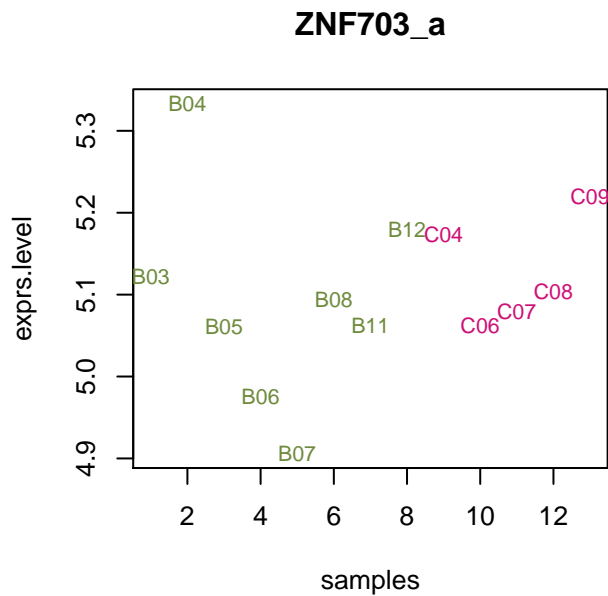

Plots of expression at time 0 in all workers of individual transcripts selected by Elastic Net at time 0

Analysis of all 30 Schiffman marker genes without fold change

**ACSL1**

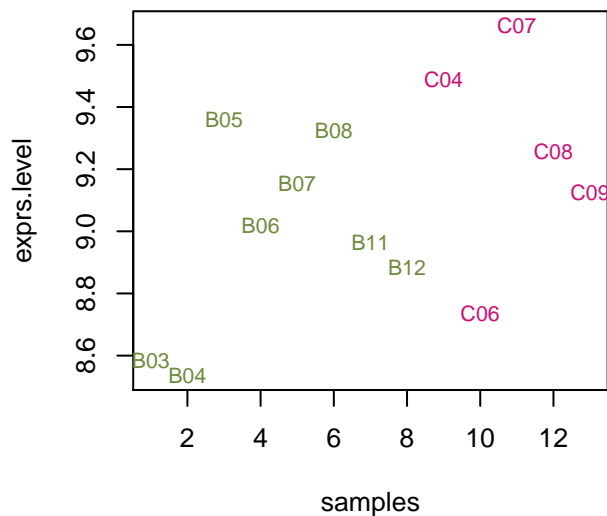

**IL1RN\_c**

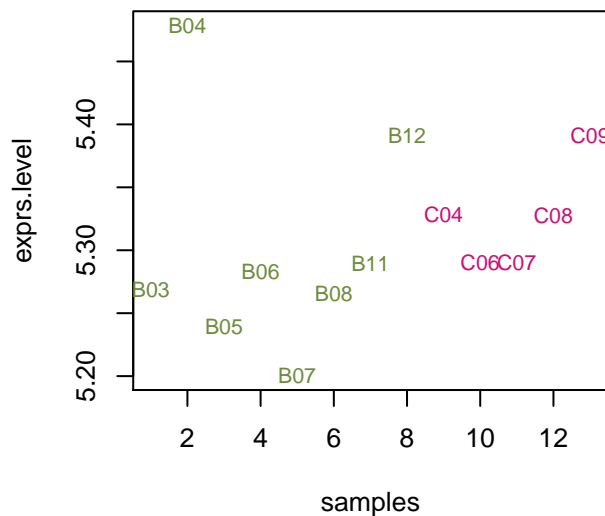

Plots of expression at time 1 in all workers of individual transcripts  
selected by Elastic Net at time 1
