# Supplementary material for: Gene Expression Response in Peripheral Blood Cells of Petroleum Workers Exposed to Sub-Ppm Benzene Levels
Source: MDPI journal article supplement (doi:10.3390/ijerph15112385), 2018-10-27
Supplement: s1 [file s1]

# Analysis of Jak-STAT pathway genes with fold change

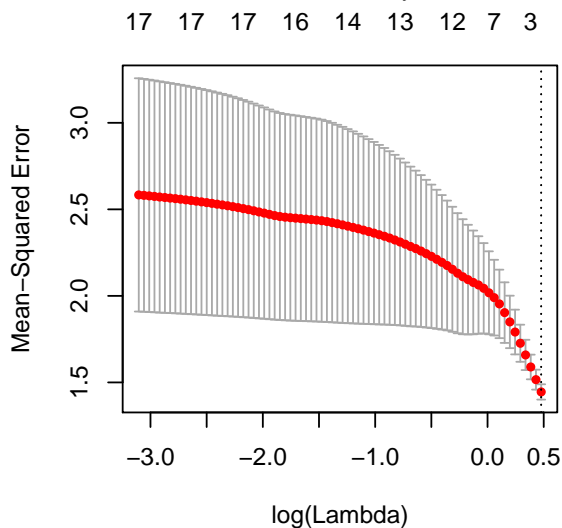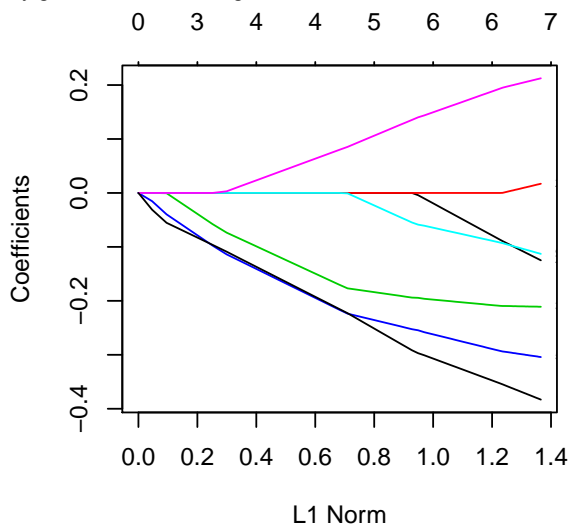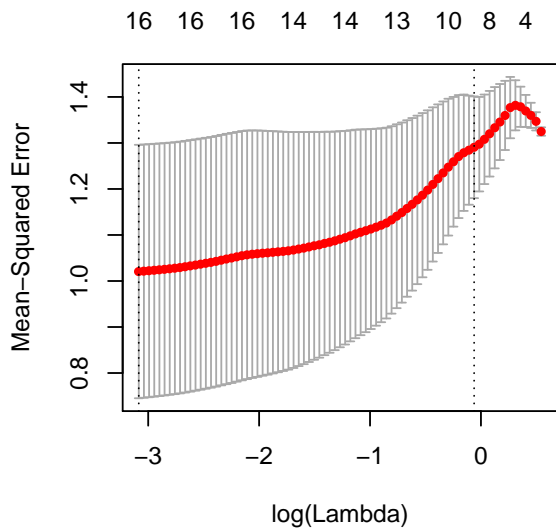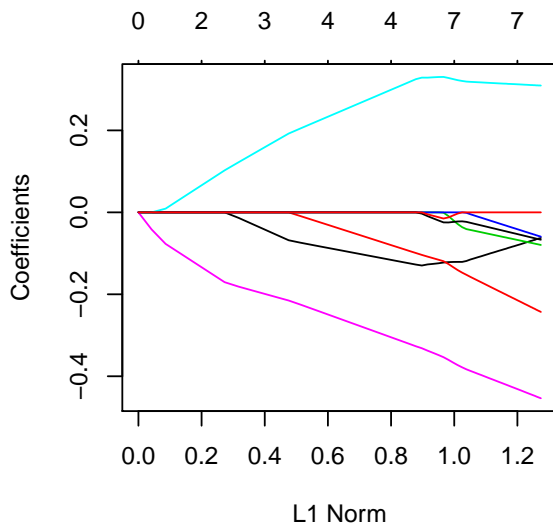

Elastic net results at time1 (top) and 2 (bottom).  
Left: Cross validation curves. Right: Coefficients for individual transcripts
